# Supplementary material
Source: PubMed Central journal article supplement (PMC1150860)
Supplement: pnas_0503469102_3.pdf [file pnas_0503469102_3.pdf]

| TAXA            | 1  | 2  | 3  | 4  | 5  | 6      | 7      | 8  | 9      | 10  | 11     | 12     | 13  | 14  | 15  | 16  | 17     | 18     | 19 | 20 | 21 | 22 | 23 | 24     | 25     | 26 | 27 | 28  | 29   | 30 | 31 | 32    | 33  |   |   |
|-----------------|----|----|----|----|----|--------|--------|----|--------|-----|--------|--------|-----|-----|-----|-----|--------|--------|----|----|----|----|----|--------|--------|----|----|-----|------|----|----|-------|-----|---|---|
|                 | i1 | i2 | i3 | i4 | i5 | i6     | i7     | i8 | i9     | i10 | i11    | i12    | i13 | i14 | i15 | i16 | i17    | i19    | c1 | c2 | c3 | c4 | c5 | c6     | p1     | p2 | p3 | p4' | p4'' | p5 | p6 | p7    | p9' |   |   |
| Scandentia      | 0  | 0  | ?  | ?  | ?  | ?      | ?      | ?  | ?      | 0   | 2      | 2      | ?   | 1   | ?   | ?   | ?      | ?      | 0  | 0  | 0  | 0  | ?  | ?      | 1      | 0  | 0  | 0   | 1    | 1  | 2  | 0     | 1   |   |   |
| Paromomys       | ?  | ?  | ?  | ?  | ?  | ?      | ?      | ?  | ?      | ?   | ?      | ?      | ?   | ?   | ?   | ?   | ?      | ?      | ?  | 0  | ?  | ?  | ?  | ?      | ?      | 1  | 0  | 0   | 1    | 1  | 0  | 2     | 1   | 1 |   |
| Plesiadapis     | 1  | 1  | 1  | ?  | 2  | 4      | ?      | ?  | 2      | ?   | 2      | 1      | 0   | 1   | ?   | 0   | 2      | 2      | 0  | 0  | ?  | ?  | ?  | 1      | 1      | 0  | 0  | 1   | 1    | 0  | 2  | 2     | ?   |   |   |
| Plesiolestes    | 1  | ?  | 1  | 0  | 1  | 4      | ?      | 0  | 2      | 0   | 2      | 1      | 0   | 1   | 0   | 0   | 0      | 2      | 0  | 0  | 0  | 0  | 0  | 1      | 1      | 0  | 0  | 1   | 1    | 0  | 2  | 0     | 1   |   |   |
| Purgatorius     | 0  | ?  | ?  | ?  | ?  | ?      | ?      | ?  | ?      | ?   | ?      | ?      | ?   | ?   | ?   | ?   | ?      | ?      | 0  | ?  | ?  | ?  | ?  | ?      | 0      | 0  | 1  | 1   | 1    | 0  | 2  | 0     | 1   |   |   |
| Adapis          | 1  | 0  | 0  | 1  | 0  | 1      | 0      | 0  | 0      | 0   | 0      | 0      | 0   | 0   | 1   | 0   | 2      | 0      | 1  | ?  | 0  | 1  | 2  | 2      | 0      | 0  | 1  | 1   | 1    | 0  | 2  | ?     | ?   |   |   |
| Notharctus      | 1  | 0  | 0  | 1  | 0  | 1      | 0      | 0  | 0      | 0   | 1      | 1      | 0   | 0   | 1   | 0   | 1      | 0      | 1  | ?  | 0  | ?  | ?  | 0      | 2      | 0  | 0  | 1   | 1    | 0  | 2  | 1     | 1   |   |   |
| Cantius         | ?  | ?  | ?  | ?  | ?  | ?      | ?      | ?  | ?      | ?   | ?      | ?      | ?   | ?   | ?   | ?   | ?      | ?      | ?  | ?  | ?  | ?  | ?  | ?      | ?      | 0  | 1  | 1   | 1    | 1  | 0  | 2     | 1   | 1 |   |
| Donrussellia    | ?  | 1  | ?  | 1  | ?  | ?      | ?      | ?  | ?      | ?   | ?      | 0      | ?   | ?   | ?   | ?   | ?      | ?      | ?  | ?  | ?  | ?  | ?  | ?      | 0      | 0  | 1  | 1   | 1    | 0  | 2  | 1     | 1   |   |   |
| Leptadapis      | 1  | ?  | ?  | 0  | ?  | 0      | ?      | ?  | ?      | 0   | 0      | 0      | 0   | 0   | 1   | ?   | 2      | 0      | 1  | ?  | 1  | 1  | 0  | 2      | 0      | 0  | 1  | 1   | 1    | 0  | 2  | 1     | 0   |   |   |
| Mahgarita       | 1  | ?  | 0  | 1  | 0  | 0      | ?      | ?  | ?      | ?   | 1      | ?      | 0   | 0   | ?   | ?   | ?      | 0      | 1  | ?  | 0  | 0  | 0  | 2      | 1      | 0  | 0  | 1   | 1    | 0  | 2  | 2     | ?   |   |   |
| Aframionius     | 1  | 0  | ?  | 1  | 0  | ?      | ?      | 0  | ?      | ?   | 0      | 0      | 0   | ?   | ?   | ?   | ?      | 0      | 1  | ?  | 0  | 0  | 0  | 2      | 1      | 0  | 0  | 1   | 1    | 0  | 2  | 2     | ?   |   |   |
| Pronycticebus   | 1  | ?  | ?  | ?  | 0  | 1      | 0      | ?  | 0      | ?   | 0      | 0      | 0   | 0   | 1   | 0   | ?      | ?      | 1  | ?  | ?  | ?  | ?  | ?      | 0      | 0  | 1  | 1   | 1    | 0  | 2  | 1     | 1   |   |   |
| Protoadapis     | 1  | ?  | ?  | ?  | 0  | 1      | ?      | ?  | ?      | ?   | ?      | ?      | ?   | ?   | ?   | ?   | ?      | ?      | 1  | ?  | 0  | 0  | ?  | 2      | 0      | 0  | 1  | 1   | 1    | 0  | 2  | 2     | ?   |   |   |
| Percnodon       | ?  | ?  | ?  | ?  | ?  | ?      | ?      | ?  | ?      | ?   | ?      | ?      | ?   | ?   | ?   | ?   | ?      | ?      | ?  | ?  | ?  | ?  | ?  | ?      | ?      | ?  | ?  | ?   | ?    | ?  | ?  | ?     | ?   | ? |   |
| Guangxilemur    | ?  | ?  | ?  | ?  | ?  | ?      | ?      | ?  | ?      | ?   | ?      | ?      | ?   | ?   | ?   | ?   | ?      | ?      | ?  | ?  | ?  | ?  | ?  | ?      | ?      | ?  | ?  | ?   | ?    | ?  | ?  | ?     | ?   | ? |   |
| Hoanghoni       | ?  | ?  | ?  | ?  | ?  | ?      | ?      | ?  | ?      | ?   | ?      | ?      | ?   | ?   | ?   | ?   | ?      | ?      | ?  | ?  | ?  | ?  | ?  | ?      | ?      | 1  | 0  | 1   | 1    | 1  | 0  | 2     | 2   | ? |   |
| Sivaladapis     | 1  | 0  | 0  | ?  | ?  | ?      | 0      | ?  | ?      | 0   | 0      | 1      | 0   | 0   | 0   | ?   | 1      | 0      | 3  | ?  | 0  | 0  | 0  | 3      | 1      | 0  | 0  | 1   | 1    | 0  | 2  | 1     | 1   |   |   |
| Galagoides      | 1  | 0  | 0  | 1  | 0  | 2      | ?      | 1  | 2      | 0   | 1      | 2      | 1   | 1   | 1   | 0   | 1      | 0      | 0  | 0  | 1  | 0  | ?  | ?      | 1      | 0  | 0  | 1   | 1    | 2  | 2  | 2     | ?   |   |   |
| Microcebus      | 1  | 0  | 0  | 1  | 0  | 2      | ?      | 1  | 2      | 0   | 1      | 2      | 1   | 1   | 1   | 0   | 1      | 0      | 0  | 0  | 0  | 1  | 0  | ?      | ?      | 1  | 0  | 0   | 0    | 1  | 1  | 2     | 2   | ? |   |
| Nycticebus      | 1  | 0  | 0  | 1  | 0  | 2      | ?      | 1  | 2      | 0   | 1      | 2      | 1   | 1   | 1   | 0   | 0      | 0      | 0  | 0  | 1  | 0  | ?  | ?      | 1      | 0  | 0  | 1   | 1    | 1  | 2  | 2     | ?   |   |   |
| Lemur           | 1  | 0  | 0  | 0  | 0  | 2      | ?      | 1  | 2      | 0   | 1      | 2      | 1   | 1   | 1   | 0   | 1      | 0      | 0  | 0  | 1  | 0  | ?  | ?      | 1      | 0  | 0  | 1   | 1    | 0  | 2  | 2     | ?   |   |   |
| Absarokius      | 1  | 0  | 0  | 1  | 0  | 2      | ?      | ?  | ?      | ?   | ?      | ?      | ?   | ?   | ?   | ?   | ?      | 0      | 0  | ?  | 0  | ?  | ?  | ?      | 1      | 0  | 0  | 1   | 1    | 0  | 2  | 2     | ?   |   |   |
| Anaptomorphus   | 1  | 0  | 0  | 1  | 0  | 2      | ?      | ?  | ?      | ?   | 0      | ?      | 0   | ?   | ?   | ?   | ?      | 1      | 0  | ?  | 1  | ?  | ?  | ?      | ?      | 1  | 1  | ?   | 1    | 1  | 1  | ?     | 2   | ? |   |
| Anemorphysis    | 1  | 1  | ?  | 1  | 2  | 4      | ?      | ?  | ?      | ?   | 2      | ?      | 0   | ?   | ?   | ?   | ?      | 2      | 0  | ?  | ?  | ?  | ?  | ?      | ?      | 1  | 0  | 0   | 1    | 1  | 1  | 2     | 1   | 1 |   |
| Arapahovius     | 1  | 1  | 0  | 1  | 2  | 4      | ?      | 0  | 2      | 0   | 2      | 2      | 0   | 1   | 1   | 0   | 2      | 2      | 0  | ?  | 2  | 0  | 1  | 0      | 1      | 0  | 0  | 1   | 1    | 1  | 2  | 0     | 2   |   |   |
| Dyseolemur      | 1  | 0  | 0  | 1  | 0  | 3      | ?      | ?  | 1      | 0   | 0      | ?      | ?   | 0   | 3   | ?   | ?      | ?      | 0  | 0  | ?  | 0  | 0  | 0      | ?      | 1  | 0  | 0   | 1    | 1  | 1  | 2     | 1   | 1 |   |
| Hemiacodon      | 1  | 1  | 0  | 1  | 1  | 3      | ?      | 0  | ?      | ?   | 2      | 1 or 2 | 0   | ?   | 1   | ?   | 1 or 2 | 1      | 0  | ?  | 2  | ?  | ?  | 0 or 1 | 1      | 0  | 0  | 1   | 1    | 1  | 1  | 2     | 2   | ? |   |
| Loveina         | 1  | 0  | ?  | 1  | 0  | 2      | ?      | ?  | ?      | ?   | 0 or 1 | ?      | 0   | ?   | ?   | ?   | ?      | ?      | 0  | ?  | ?  | ?  | ?  | ?      | ?      | 1  | 0  | 0   | 1    | 1  | 1  | 1     | 0   | 0 |   |
| Macrotarsius    | 1  | ?  | ?  | 1  | 0  | 3      | ?      | ?  | ?      | ?   | 1      | ?      | 0   | ?   | ?   | ?   | ?      | ?      | 1  | ?  | ?  | ?  | ?  | ?      | ?      | 1  | 0  | 0   | 1    | 1  | 0  | ?     | 0   | 1 |   |
| Microchoerus    | 1  | 1  | 0  | 1  | 2  | 4      | ?      | ?  | 2      | 0   | 1      | 1      | 0   | 1   | ?   | 0   | 2      | 2      | 0  | ?  | 2  | 0  | 1  | 0      | 1      | 1  | 0  | 0   | 1    | 2  | 2  | 2     | 1   |   |   |
| Nannopithec     | 1  | 1  | 0  | 1  | 2  | 4      | ?      | ?  | 2      | 0   | 1      | 2      | 0   | 1   | 1   | 0   | 2      | ?      | 0  | ?  | 0  | 0  | 1  | 0      | 1      | 1  | 0  | 0   | 1    | 2  | 2  | 2     | 0   |   |   |
| Necrolemur      | 1  | 1  | 0  | 1  | 2  | 4      | ?      | ?  | 2      | 0   | 1      | 2      | 0   | 1   | ?   | 0   | 2      | 2      | 0  | ?  | 0  | 0  | 1  | 0      | 1      | 1  | 0  | 0   | 1    | 2  | 2  | 2     | 1   |   |   |
| Omomys          | 1  | 1  | 0  | 1  | 2  | 3 & 4  | ?      | 0  | 1 or 2 | 0   | 1      | 1      | 0   | 1   | 0   | ?   | 2      | 1      | 0  | ?  | 0  | 0  | 0  | 1      | 1      | 0  | 0  | 1   | 1    | 1  | 2  | 2     | ?   |   |   |
| Shoshonius      | 1  | 0  | ?  | 1  | 0  | 2      | ?      | ?  | ?      | ?   | ?      | ?      | ?   | ?   | ?   | ?   | ?      | 0      | 0  | ?  | 0  | 0  | 1  | 1      | 1      | 0  | 0  | 0   | 1    | 1  | 1  | 1     | 1   | 2 |   |
| Steinius        | 1  | 1  | ?  | 1  | 0  | 3      | ?      | ?  | ?      | ?   | 1 or 2 | ?      | 0   | ?   | ?   | ?   | ?      | ?      | 1  | ?  | ?  | ?  | ?  | ?      | ?      | 0  | 0  | 0   | 1    | 1  | 0  | 2     | 2   | 1 |   |
| Strigorhysis    | 1  | 0  | ?  | 1  | 1  | 2      | ?      | ?  | ?      | ?   | 0      | ?      | 0   | ?   | ?   | ?   | ?      | ?      | 1  | 0  | ?  | ?  | ?  | ?      | ?      | 1  | 1  | 0   | 1    | 1  | 2  | ?     | 2   | ? |   |
| Teilhardina_a   | 1  | 1  | 0  | 1  | 1  | 3      | ?      | ?  | ?      | ?   | 2      | ?      | 0   | ?   | ?   | ?   | ?      | 0 or 1 | 0  | ?  | 0  | 0  | 0  | 1      | 0 & 1  | 0  | 0  | 1   | 1    | 0  | 2  | 1     | 2   |   |   |
| Teilhardina_b   | 1  | 1  | ?  | 1  | 0  | 2 or 3 | ?      | ?  | ?      | ?   | ?      | ?      | ?   | ?   | ?   | ?   | ?      | ?      | 0  | 0  | ?  | ?  | ?  | ?      | 0 & 1  | 0  | 0  | 1   | 1    | 0  | 2  | 2     | 1   | 1 |   |
| Tetonius        | 1  | 1  | 0  | 1  | 2  | 4      | ?      | ?  | 0      | 2   | 0      | 2      | 0   | 1   | 1   | 0   | 2      | 2      | 0  | ?  | 0  | 0  | 1  | 0      | 1      | 0  | 0  | 1   | 1    | 2  | 2  | 1 & 2 | 2   |   |   |
| Uintanius       | 1  | 0  | ?  | 1  | 0  | 2 & 3  | ?      | ?  | ?      | ?   | 1      | ?      | 0   | ?   | ?   | ?   | ?      | ?      | 0  | 0  | ?  | ?  | ?  | ?      | ?      | 1  | 0  | 0   | 1    | 1  | 2  | 2     | 1   | 0 |   |
| Washakius       | 1  | 0  | 0  | 1  | 0  | 2      | ?      | ?  | 0 or 1 | ?   | 0      | ?      | 0   | 1   | 1   | 0   | 2      | 0      | 0  | ?  | 0  | 0  | ?  | ?      | 0 or 1 | 1  | 0  | 0   | 1    | 1  | 1  | 1     | 0   | 2 |   |
| Atrotarsius     | ?  | ?  | ?  | ?  | ?  | ?      | ?      | ?  | ?      | ?   | ?      | ?      | ?   | ?   | ?   | ?   | ?      | ?      | ?  | ?  | ?  | ?  | ?  | ?      | ?      | ?  | ?  | ?   | ?    | ?  | ?  | ?     | ?   | ? |   |
| Eosimias        | 1  | 0  | 0  | 1  | 0  | 0      | 0      | 0  | 0      | 0   | 0      | 0      | 0   | 0   | 1   | 0   | 0      | 0      | ?  | 2  | ?  | 0  | 0  | 0      | 2      | 1  | 0  | 0   | 1    | 1  | 1  | 2     | 1   | 2 |   |
| Phenacopithecus | ?  | ?  | ?  | ?  | ?  | ?      | ?      | 0  | 0      | 0   | 0      | 0      | 0   | 0   | 1   | 0   | 0      | ?      | ?  | ?  | ?  | ?  | ?  | ?      | ?      | ?  | 0  | 0   | 1    | 1  | ?  | 2     | 2   | ? |   |
| Bahinia         | 1  | ?  | 0  | ?  | 0  | 0      | 0      | 0  | 0      | 0   | 0      | 0      | 0   | 0   | 1   | 0   | 1      | 0      | 2  | ?  | 0  | ?  | ?  | 2      | 1      | 0  | 0  | 1   | 1    | 0  | ?  | 2     | ?   |   |   |
| Tarsius         | 2  | ?  | ?  | 1  | ?  | ?      | ?      | 1  | 2      | 0   | 0      | 0      | 0   | 0   | 1   | ?   | 0      | 0      | 0  | 1  | 0  | 0  | 1  | 0      | 0      | 1  | 0  | 0   | 0    | 1  | 2  | 2     | 2   | ? |   |
| Xanthorhysis    | ?  | ?  | ?  | ?  | ?  | ?      | ?      | ?  | ?      | ?   | ?      | ?      | ?   | ?   | ?   | ?   | ?      | ?      | 1  | ?  | 0  | ?  | ?  | ?      | ?      | 1  | 0  | 0   | 1    | 1  | 2  | 2     | 2   | ? |   |
| Aegyptopithecus | 1  | 0  | 0  | 0  | 0  | 1      | 0      | 0  | 1      | 0   | 0      | 0      | 0   | 0   | 1   | 0   | 1      | 0      | 1  | 2  | 0  | 0  | 0  | 2      | 1      | 1  | ?  | ?   | 1    | 0  | 2  | 2     | ?   |   |   |
| Moeripithecus   | ?  | ?  | ?  | ?  | ?  | ?      | ?      | ?  | ?      | ?   | ?      | ?      | ?   | ?   | ?   | ?   | ?      | ?      | ?  | ?  | ?  | ?  | ?  | ?      | ?      | 1  | 1  | ?   | ?    | 1  | 1  | 0     | 2   | 2 | ? |
| Apidium         | 1  | 0  | 0  | 1  | 0  | 1      | 0      | 0  | 0      | 0   | 0      | 0      | 0   | 0   | 1   | 0   | 2      | 0      | 1  | 2  | 0  | 0  | 0  | 2      | 1      | 0  | 0  | 1   | 1    | 0  | 2  | 2     | ?   |   |   |
| Arsinoea        | 1  | 0  | 0  | 1  | 1  | 0 or 1 | ?      | ?  | 0      | 1   | 0      | 0      | 0   | 0   | 1   | 0   | 2      | 0      | 1  | ?  | 1  | 0  | 0  | 2      | 1      | 0  | 0  | ?   | ?    | 1  | 2  | 1     | 1   | 1 |   |
| Catopithecus    | 1  | ?  | 0  | ?  | ?  | 1      | 0      | 0  | 1      | 0   | 0      | 0      | 0   | 0   | 1   | 0   | ?      | ?      | 1  | 2  | 0  | 0  | 0  | 2      | 1      | 1  | ?  | ?   | 1    | 0  | 1  | 1     | 1   |   |   |
| Oligopithecus   | ?  | ?  | ?  | ?  | ?  | ?      | ?      | ?  | ?      | ?   | ?      | ?      | ?   | ?   | ?   | ?   | ?      | ?      | ?  | ?  | ?  | ?  | ?  | ?      | ?      | 2  | 1  | 1   | ?    | 1  | 1  | 0     | 2   | 1 | 1 |
| Parapithecus    | ?  | 0  | 0  | 1  | 0  | 1      | 0 or 1 | 0  | 0      | 0   | 0      | 0      | 0   | 0   | 1   | 0   | 2      | 0      | 1  | ?  | 0  | 0  | 0  | 2      | 1      | 0  | 0  | 1   | 1    | 0  | 2  | 2     | ?   |   |   |
| Proteopithecus  | 1  | ?  | ?  | ?  | ?  | ?      | ?      | ?  | ?      | ?   | ?      | ?      | ?   | ?   | ?   | ?   | ?      | ?      | ?  | 2  | ?  | ?  | ?  | ?      | 2      | 1  | 0  | 0   | 1    | 1  | 2  | 2     | 1   | 1 |   |
| Qatrania        | 2  | ?  | ?  | ?  | ?  | ?      | ?      | ?  | ?      | ?   | ?      | ?      | ?   | ?   | ?   | ?   | ?      | ?      | ?  | ?  | ?  | ?  | ?  | ?      | ?      | ?  | 0  | 0   | 1    | 1  | 0  | ?     | 1   | 1 |   |
| Serapia         | 2  | ?  | ?  | ?  | ?  | ?      | ?      | ?  | ?      | ?   | ?      | ?      | ?   | ?   | ?   | ?   | ?      | ?      | 1  | ?  | ?  | ?  | ?  | ?      | 2      | 1  | 0  | 0   | 1    | 1  | 1  | 2     | 1   | 1 |   |
| Simonsius       | 3  | ?  | ?  | ?  | ?  | ?      | ?      | ?  | ?      | ?   | ?      | ?      | 0   | ?   | ?   | ?   | ?      | ?      | 1  | ?  |    |    |    |        |        |    |    |     |      |    |    |       |     |   |   |

| TAXA            | 34              | 35  | 36    | 37  | 38  | 39  | 40  | 41    | 42     | 43     | 44  | 45  | 46  | 47  | 48    | 49  | 50  | 51  | 52  | 53  | 54    | 55    | 56  | 57  | 58  | 59  | 60  | 61     | 62    | 63    | 64    | 65 | 66 |   |   |
|-----------------|-----------------|-----|-------|-----|-----|-----|-----|-------|--------|--------|-----|-----|-----|-----|-------|-----|-----|-----|-----|-----|-------|-------|-----|-----|-----|-----|-----|--------|-------|-------|-------|----|----|---|---|
|                 | p9 <sup>+</sup> | p11 | p13   | p14 | p15 | p16 | p17 | p18   | p19    | p20    | p21 | p22 | p23 | p24 | p25   | p26 | p27 | p28 | p29 | p30 | p31   | p33   | p34 | p36 | p37 | p40 | p41 | p42    | p43   | p44   | p45   | m1 | m2 |   |   |
| Scandentia      | 0               | 0   | 2     | 0   | 0   | 0   | 0   | 1     | 0      | 0      | 0   | 1   | 1   | 0   | 1     | ?   | 0   | 0   | 0   | 0   | ?     | 0     | ?   | ?   | 1   | 0   | 0   | ?      | ?     | ?     | 0     | 1  |    |   |   |
| Paromomys       | 0               | 1   | 2     | 1   | 0   | 0   | 1   | 1     | ?      | 2      | 0   | ?   | 0   | 0   | 1     | 0   | 1   | ?   | 1   | ?   | 0     | 2     | 1   | 0   | 0   | 1   | 1   | 0      | 0     | ?     | 5     | 0  | 0  | 1 |   |
| Plesiadapis     | ?               | 0   | ?     | ?   | 0   | 0   | 0   | 1     | 1      | 1      | ?   | 2   | ?   | ?   | 1     | 0   | 0   | ?   | 1   | 1   | 0     | 1     | 0   | 0   | ?   | ?   | 2   | 3      | 1     | 1     | 0     | 0  | 1  |   |   |
| Plesiolestes    | 0               | 2   | 2     | 0   | ?   | 1   | 2   | 1     | 2      | 2      | 0   | 1   | 1   | 0   | 1     | 0   | 2   | ?   | 0   | ?   | ?     | ?     | ?   | ?   | ?   | ?   | ?   | ?      | ?     | ?     | ?     | 0  | 1  |   |   |
| Purgatorius     | 0               | 2   | 2     | 0   | 0   | 0   | 0   | 1     | 1      | 1      | 0   | 1   | 1   | 0   | 1     | 0   | 0   | 0   | 0   | 0   | 2     | 0     | 0   | 0   | 0   | 0   | 1   | 0      | 1     | 5     | 1     | 0  | 0  | 1 |   |
| Adapis          | ?               | 2   | 2     | 1   | 0   | 0   | 2   | 1     | 0      | 2      | 0   | 1   | 1   | 0   | 0     | 0   | 2   | 2   | ?   | 0   | 3     | 1     | 1   | 0   | 0   | ?   | 2   | 1      | 4     | 3     | 0     | 0  | 1  |   |   |
| Notharctus      | 0               | 1   | 2     | 0   | 0   | 0   | 2   | 0 & 1 | 0      | 1      | 0   | 1   | 1   | 0   | 1     | 0   | 1   | 0   | 0   | 0   | 1     | 0     | 1   | 1   | 0   | 0   | 1   | 1 & 2  | 3     | 2     | 0     | 0  | 1  |   |   |
| Cantius         | 0               | 2   | ?     | 1   | ?   | 0   | 2   | 1     | 1      | 1      | 0   | 1   | 1   | 0   | 0     | 0   | 1   | ?   | 0   | 0   | 2     | 0     | 1   | 1   | 0   | 0   | 2   | 3      | 4     | 2     | 0     | 0  | 1  |   |   |
| Donrussellia    | 0               | 1   | ?     | 1   | ?   | 0   | 1   | 1     | ?      | 1      | 0   | ?   | 1   | 0   | 1     | 0   | 2   | ?   | 0   | 0   | 1 & 2 | 0     | 1   | 2   | 0   | 0   | 1   | ?      | 5     | 3     | 0     | 0  | 1  |   |   |
| Leptadapis      | 0               | 2   | 2     | 0   | 0   | 0   | 2   | 1     | 0      | 1      | 0   | 1   | 1   | 0   | 0     | 0   | 2   | 2   | 0   | 0   | 1     | 0     | 1   | 0   | 0   | ?   | 2   | 3      | 4     | 4     | 1     | 0  | 1  |   |   |
| Mahgarita       | ?               | 1   | 2     | ?   | 0   | 0   | 0   | 1     | 0      | 1      | ?   | 1   | 1   | 0   | 1     | 0   | 0   | ?   | 0   | 0   | 1     | 0     | 1   | 1   | 1   | ?   | 3   | 3      | 5     | 2     | 0     | 0  | 1  |   |   |
| Aframionius     | ?               | 2   | 3     | 0   | 0   | 0   | 1   | 1     | 1      | 1      | 0   | ?   | 1   | 0   | ?     | 0   | 0   | 0   | 0   | 0   | 2     | 0     | 0   | 1   | 1   | 1   | ?   | 3      | 2     | 3 & 4 | 1     | 0  | 0  | 1 |   |
| Pronycticebus   | 0               | 1   | ?     | 1   | ?   | 0   | 1   | 1     | 0      | 2      | 0   | 1   | 1   | 0   | 1     | 0   | 1   | ?   | 0   | 0   | 2     | 0     | 1   | 0   | 0   | ?   | 2   | 4      | 3     | 0     | 0     | 1  |    |   |   |
| Protoadapis     | ?               | 2   | 2     | 0   | 0   | 0   | 1   | 1     | 1      | 1      | 0   | 1   | 1   | 0   | 0     | 1   | 0   | ?   | 0   | 0   | 2     | 0     | 1   | 0   | 1   | ?   | 3   | 2 & 3  | 3     | 5     | 0     | 0  | 1  |   |   |
| Percinodan      | ?               | ?   | ?     | ?   | ?   | ?   | ?   | ?     | ?      | ?      | ?   | ?   | ?   | ?   | ?     | ?   | ?   | ?   | ?   | ?   | ?     | ?     | ?   | ?   | ?   | ?   | ?   | ?      | ?     | ?     | ?     | ?  | 0  | 1 |   |
| Guangxilemur    | ?               | 1   | ?     | ?   | ?   | 0   | ?   | ?     | 0      | ?      | ?   | 1   | ?   | 0   | 1     | 1   | ?   | ?   | ?   | ?   | ?     | ?     | ?   | ?   | ?   | ?   | ?   | ?      | ?     | ?     | ?     | ?  | 0  | 1 |   |
| Hoanghoni       | ?               | 1   | 2     | 1   | 0   | 0   | 0   | 1     | 0      | 1      | 0   | 1   | 1   | 0   | 1     | 1   | 0   | 0   | 0   | 1   | 0     | 0     | 0   | 0   | ?   | ?   | 2   | 2      | 5     | 2     | 0     | 0  | 1  |   |   |
| Sivaladapis     | 0               | 2   | 1     | 1   | 0   | 0   | 2   | 1     | 0      | 2      | 0   | 1   | 1   | 0   | 0     | 0   | 2   | 0   | 0   | 0   | 3     | 0     | 0   | 0   | 1   | 1   | ?   | 0      | 4     | 5     | 0     | 0  | 1  |   |   |
| Galagoides      | ?               | 2   | 0     | 1   | 0   | 0   | 2   | 1     | 0      | 2      | 0   | 1   | 1   | 0   | 0     | 0   | 1   | 0   | 1   | 0   | 3     | 1     | 0   | 0   | 0   | ?   | 2   | 3      | 2     | 0     | 1     | 0  | 1  |   |   |
| Microcebus      | ?               | 0   | 2     | ?   | 0   | 0   | 0   | 1     | 0      | 0      | ?   | 1   | 1   | 0   | 0     | 1   | 0   | 2   | 1   | 0   | 1     | 1     | 1   | 1   | 0   | ?   | 2   | 3      | 1     | 2     | ?     | 0  | 1  |   |   |
| Nycticebus      | ?               | 0   | 0     | ?   | 0   | 0   | 0   | 1     | 0      | 0      | ?   | 1   | 1   | 0   | 1     | 0   | 0   | 0   | 1   | 0   | 0     | 0     | 0   | 0   | ?   | ?   | 2   | 2      | 3     | 1     | 2     | 0  | 1  |   |   |
| Lemur           | ?               | 1   | 0     | 1   | 0   | 0   | 1   | 1     | 0      | 0      | 1   | 1   | 0   | 0   | 1     | 0   | 0   | 0   | 1   | 0   | 2     | 0     | 0   | 1   | 0   | 0   | 1   | 0      | 5     | 3     | 0     | 0  | 1  |   |   |
| Absarokius      | ?               | 1   | 3     | 0   | 0   | 0   | 1   | 1     | 0 & 1  | 1      | 0   | 2   | 1   | 0   | 1     | 1   | 0   | 0   | 2   | 2   | 0     | 1 & 2 | 0   | 0   | 0   | ?   | 0   | 0      | 0     | 5     | 0     | 0  | 1  |   |   |
| Anaptomorphus   | ?               | 1   | ?     | 0   | ?   | 0   | 1   | 1     | ?      | 1      | 0   | 2   | 1   | 0   | 1     | 1   | 0   | ?   | 2   | 1   | 1     | 1     | 0   | 0   | ?   | ?   | 0   | 0      | 1     | 3     | 0     | 0  | 1  |   |   |
| Anemorhysis     | 0               | 1   | ?     | 0   | ?   | 0   | 1   | 1     | 0      | 2      | 0   | 1   | 1   | 0   | 1     | 1   | 0   | ?   | 1   | 0   | 1     | 2     | 1   | 0   | 0   | 0   | 1   | 1      | 1 & 2 | 1     | 0     | 0  | 1  |   |   |
| Arapahovius     | 0               | 1   | 3     | 0   | 0   | 1   | 2   | 1     | 1      | 2      | 0   | 1   | 1   | 0   | 1     | 1   | 0   | 0   | 1   | 1   | 0     | 2     | 1   | 1   | 1   | 1   | 1   | 2      | 2 & 3 | 0 & 1 | 0     | 0  | 1  |   |   |
| Dysecolmur      | 0               | 1   | ?     | 0   | 0   | 0   | 1   | 1     | 0      | 1      | 0   | 1   | 1   | 0   | 1     | 0   | 1   | ?   | 2   | 1   | 1     | 2     | 1   | 1   | 1   | 1   | 1   | ?      | 2     | 1     | 0     | 0  | 1  |   |   |
| Hemiacodon      | ?               | 2   | 3     | 1   | 0   | 0   | 2   | 0 & 1 | 2      | 2      | 0   | 1   | 0   | 0   | 1     | 0   | 1   | 0   | 0   | 1   | 1     | 1     | 1   | 1   | 1   | 1   | ?   | 2      | 3     | 3     | 0     | 0  | 0  | 1 |   |
| Loveina         | 0               | 1   | ?     | 1   | ?   | 0   | 1   | 1     | 0      | 0      | 0   | 1   | 1   | 0   | 1     | 0   | 1   | ?   | 2   | 1   | 1     | 2     | 1   | 1   | 1   | 1   | 1   | 3      | 2     | 2     | 0     | 0  | 1  |   |   |
| Macrotarsius    | 0               | 1   | ?     | 1   | ?   | ?   | 2   | 1     | ?      | 2      | 0   | 0   | 0   | 0   | 1     | 0   | 1   | ?   | 2   | 1   | 1     | 0     | 1   | 2   | 1   | 0   | ?   | ?      | 1 & 2 | 0     | 0     | 0  | 1  |   |   |
| Microchoerus    | 0               | 0   | ?     | 1   | ?   | 0   | 2   | 0     | 1      | 1      | 0   | 1   | 0   | 0   | 1     | 1   | 1   | ?   | 2   | 1   | 1     | 2     | 1   | 1   | 1   | 1   | 0   | 2      | 3     | 1     | 0     | 0  | 1  |   |   |
| Nannopithec     | 0               | 1   | 2     | 1   | ?   | 0   | 1   | 1     | 0      | 0      | 0   | 1   | 1   | 0   | 1     | 0   | 1   | ?   | 2   | 2   | 1     | 2     | 0   | 0   | 1   | 0   | 0   | 0      | 2     | 2     | 0     | 0  | 1  |   |   |
| Necrolemur      | 0               | 1   | ?     | 1   | ?   | 0   | 2   | 0     | 1      | 1      | 0   | 1   | 1   | 0   | 1     | 1   | 1   | ?   | 2   | 1   | 1     | 2     | 1   | 1   | 1   | ?   | 2   | 3      | 1     | 0     | 0     | 0  | 1  |   |   |
| Omomys          | ?               | 1   | 3     | 0   | 0   | 0   | 1   | 1     | 0      | 1      | 0   | 1   | 0   | 0   | 1     | 0   | 1   | 0   | 0   | 0   | 1     | 1     | 1   | 1   | 1   | 1   | 0   | 2      | 3     | 3 & 4 | 2     | 0  | 0  | 1 |   |
| Shoshonius      | 0               | 1   | 3     | 1   | 0   | 1   | 1   | 1     | 0      | 0 & 1  | 0   | 0   | 1   | 0   | 1     | 0   | 0   | 0   | 2   | 1   | 1     | 2     | 1   | 1   | 1   | 1   | 1   | 1      | 2 & 3 | 1 & 2 | 2     | 0  | 0  | 1 |   |
| Steinius        | 0               | 1   | ?     | 0   | ?   | 0   | 1   | 0 & 1 | 2      | 2      | 0   | 1   | 0   | 1   | 0     | ?   | 0   | 0   | 1   | 2   | 1     | 2     | 1   | 1   | 1   | 1   | ?   | 2      | 3     | 3     | 1     | 0  | 0  | 1 |   |
| Strigorhysis    | ?               | 1   | ?     | ?   | ?   | 0   | 1   | 1     | ?      | 1 & 2  | 0   | 0   | 1   | 0   | 1     | 1   | 1   | 0   | 2   | 1   | 1     | 1     | 0   | 0   | 1   | ?   | 0   | 0      | 1     | 3     | 0     | 0  | 1  |   |   |
| Teilhardina_a   | 0               | 1   | 3     | 0   | 0   | 0   | 1   | 1     | 1      | 1 & 2  | 0   | 1   | 1   | 0   | 1     | 1   | 0   | 0   | 0   | 1   | 0 & 1 | 1     | 1   | 0   | 0   | 0   | 1   | 1 & 2  | 2     | 1     | 0     | 0  | 1  |   |   |
| Teilhardina_b   | 0               | 1   | ?     | 0   | ?   | 0   | 1   | 1     | 1      | 2      | 0   | 1   | 1   | 0   | 1     | 0   | 0   | ?   | 0   | 0   | ?     | 0     | 0   | 0   | 0   | 0   | 1   | 1 & 2  | 3 & 4 | 3     | 0     | 0  | 1  |   |   |
| Tetonius        | 0               | 1   | 3     | 0   | 0   | 0   | 1   | 1     | 1      | 1      | 0   | 2   | 1   | 0   | 1     | 1   | 2   | 0   | 2   | 1   | 1     | 1     | 0   | 0   | 1   | 1   | 0   | 1      | 1     | 2 & 3 | 0     | 0  | 1  |   |   |
| Uintanius       | 0               | 1   | ?     | 0   | ?   | 0   | 0   | 1     | 0      | 0      | 0   | 2   | 1   | 0   | 1     | 1   | 0   | ?   | 2   | 2   | 0     | 0     | 0   | 0   | 1   | 2   | 1   | 1      | 0     | 5     | 0     | 0  | 1  |   |   |
| Washakius       | 0               | 0   | 2 & 3 | 1   | 0   | 1   | 1   | 0 & 1 | 0      | 0      | 0   | 1   | 1   | 0   | 1     | 0   | 0   | 0   | 2   | 1   | 1     | 2     | 1   | 1   | 1   | 1   | 1   | 2      | 1 & 2 | 2     | 0     | 0  | 1  |   |   |
| Atrotarsius     | ?               | ?   | ?     | ?   | ?   | ?   | ?   | ?     | ?      | ?      | ?   | ?   | ?   | ?   | ?     | ?   | ?   | ?   | ?   | ?   | ?     | ?     | ?   | ?   | ?   | ?   | ?   | ?      | ?     | ?     | ?     | ?  | ?  | 0 | 1 |
| Eosimias        | 0               | 1   | 3     | 0   | 0   | 0   | 1   | 1     | 0      | 0 or 1 | 0   | 1   | 1   | 0   | 0 & 1 | 1   | 0   | 1   | 1   | 1   | 1     | 1     | 1   | 0   | 0   | 0   | ?   | 2      | 0     | 3     | 2     | 2  | 0  | 1 |   |
| Phenacopithecus | ?               | 1   | 3     | 1   | 0   | 0   | 1   | 1     | 0      | 0 or 1 | 0   | 1   | 1   | 0   | 1     | 0   | 1   | 2   | 1   | 1   | 1     | ?     | ?   | 1   | 0   | 0   | ?   | ?      | 3     | 3     | 2     | ?  | 0  | 1 |   |
| Bahinia         | ?               | 2   | 2     | ?   | 0   | 0   | 0   | 0     | 1      | 1      | 0   | ?   | 1   | 0   | 1     | 0   | 1   | 0   | 0   | 0   | 1     | 1     | 1   | 1   | 1   | 2   | ?   | 1 or 2 | 3     | 3     | 2     | 0  | 0  | 1 |   |
| Tarsius         | ?               | 1   | 2     | 0   | 0   | 0   | 1   | 1     | 0 or 1 | 0 or 1 | 0   | 1   | 1   | 0   | 1     | 0   | 0   | 2   | 1   | 1   | 1     | 1     | 1   | 1   | 1   | 1   | 0   | 0      | 0     | 1 & 2 | 0 & 1 | 1  | 0  | 1 |   |
| Xanthorhysis    | ?               | 1   | ?     | 0   | ?   | 0   | 1   | 1     | 1      | 1      | 0   | 1   | 1   | 0   | 1     | 0   | 0   | ?   | 1   | 1   | 0     | 1     | 1   | 1   | 1   | 1   | 0   | 1      | 0     | 3     | 1     | 0  | 0  | 1 |   |
| Aegyptopithecus | ?               | 1   | ?     | 1   | ?   | 0   | 2   | 0     | 0      | 1      | 0   | 1   | 0   | 0   | 1     | 0   | 0   | ?   | 1   | 0   | 3     | 0     | 1   | 0   | 1   | ?   | 3   | 3      | 0     | 1     | 2     | 0  | 1  |   |   |
| Moeripithecus   | ?               | 1   | ?     | 1   | ?   | 0   | 2   | 0     | 1      | 1      | 0   | 1   | 0   | 0   | 1     | 1   | 1   | ?   | 1   | ?   | 2     | 0     | 0   | 1   | 1   | ?   | 3   | 3      | 1     | 2     | 2     | 0  | 1  |   |   |
| Apidium         | ?               | 0   | 0     | 0   | 0   | 1   | 1   | 1     | 0      | 0      | 1   | 1   | 1   | 1   | 0     | 1   | 0   | 1   | 2   | 0   | 1     | 0     | 0   | 0   | 0   | ?   | 1   | 3      | 1     | 1     | 2     | 0  | 1  |   |   |
| Arsinoea        | 0               | 1   | 2     | 0   | 0   | 1   | 1   | 0     | 1      | 1      | 0   | 1   | 1   | 0   | 1     | 0   | 1   | 0   | 1   | 1   | 1     | 1     | 1   | 1   | 0   | 0   | 1   | 2      | 1     | 0     | 1     | 2  | 0  | 1 |   |
| Catopithecus    | 0               | 0   | ?     | 1   | ?   | 0   | 2   | 1     | 0      | 1      | 0   | 1   | 0   | 0   | 1     | 1   | 1   | ?   | 0   | 0   | 2     | 0     | 0   | 1   | 1   | 1   | 2   | 2      | 1     | 1     | 2     | 0  | 1  |   |   |
| Oligopithecus   | 0               | 2   | ?     | 1   | ?   | 0   | 2   | 1     | 0      | 2      | 0   | 1   | 0   | 0   | 1     | 0   | 1   | ?   | 1   | 0   | 2     | 0     | 0   | 1   | 1   | 0   | 2   | 3      | 3     | 1     | 1     | 0  | 1  |   |   |
| Parapithecus    | ?               | 0   | 1     | 0   | 0   | 1   | 1   | 0     | 0      | 1      | 1   | 1   | 1   | 0   | 1     | 0   | 1   | 2   | 0   | 1   | 2     | 0     | 0   | 0   | 0   | ?   | 2   | 2      | 2     | 3     | 2     | 0  | 1  |   |   |
| Proteopithecus  | 0               | 1   | 0     | 1   | 0   | 0   | 2   | 1     | 0      | 2      | 0   | 1   | 0   | 0   | 1     | 1   | 1   | 2   | 1   | 1   | 2     | 0     | 1   |     |     |     |     |        |       |       |       |    |    |   |   |

| TAXA            | 67 | 68 | 69 | 70    | 71    | 72    | 73    | 74     | 75    | 76    | 77    | 78    | 79     | 80     | 81  | 82    | 83  | 84     | 85  | 86  | 87    | 88    | 89  | 90    | 91  | 92     | 93     | 94  | 95     | 96     | 97  | 98     | 99     |        |        |   |
|-----------------|----|----|----|-------|-------|-------|-------|--------|-------|-------|-------|-------|--------|--------|-----|-------|-----|--------|-----|-----|-------|-------|-----|-------|-----|--------|--------|-----|--------|--------|-----|--------|--------|--------|--------|---|
|                 | m3 | m4 | m6 | m7    | m8    | m9    | m10   | 10     | m11   | m12   | m13   | m14   | m15    | m16    | m17 | m18   | m19 | m20    | m21 | m22 | m23   | m24   | m25 | m26   | m27 | m28    | m29    | m30 | m31    | m32    | m33 | m34    | m35    |        |        |   |
| Scandentia      | 1  | 1  | 1  | 0     | 2     | 2     | 2     | 0      | 0     | 0     | 0     | 1     | 0      | 0      | 0   | 0     | 1   | 2      | 0   | 0   | 0     | 1     | 3   | 0     | 1   | 1      | 2      | 0   | 2      | 1      | 1   | 0      | 0      |        |        |   |
| Paromomys       | 1  | 1  | 1  | 1     | 1     | 2     | 2     | 1      | 0     | 1     | 1     | 2     | 0      | 0      | 0   | 0     | 1   | 1      | 0   | 1   | 1     | 1     | 3   | 2     | 3   | 3      | 0      | ?   | 1      | 1      | 1   | 0      | 0      |        |        |   |
| Plesiadapis     | 1  | 1  | 2  | 1     | 2     | 2     | 2     | 1      | 0     | 0     | 1     | 2     | 0      | 0      | 0   | 0     | 1   | 2      | 0   | 0   | 0     | 0     | 1   | 3     | 1   | 1      | 2      | 0   | 1      | 1      | 2   | 1      | 3      | 0      |        |   |
| Plesiolestes    | 1  | 1  | 2  | 1     | 2     | 2     | 2     | 1      | 0     | 0     | 1     | 2     | 0      | 0      | 0   | 0     | 1   | 2      | 0   | 0   | 0     | 1     | 3   | 2     | 2   | 2      | 0      | 0   | 1      | 1      | 1   | 1      | 3      | 0      |        |   |
| Purgatorius     | 1  | 1  | 1  | 1     | 2     | 2     | 2     | 0      | 0     | 0     | 0     | 1     | 0      | 0      | 0   | 0     | 1   | 2      | 0   | 0   | 0     | 0     | 1   | 3     | 2   | 1      | 1      | 0   | 1      | 2      | 2   | 2      | 3      | 3      |        |   |
| Adapis          | 1  | 1  | 1  | 1     | ?     | ?     | ?     | ?      | 0     | 2     | 0     | 1     | 0      | 1      | 0   | 0     | 1   | 0      | 0   | 0   | 0     | 0     | 1   | 3     | 1   | 3      | 3      | 0   | ?      | 1      | 1   | 1      | 2      | 3      | 1      |   |
| Notharctus      | 1  | 1  | 1  | 1     | 2     | 2     | 2     | 1      | 0 & 1 | 1     | 0 & 1 | 1     | 0      | 0 & 1  | 0   | 0     | 1   | 2      | 0   | 0   | 0     | 0     | 1   | 3     | 2   | 2      | 2      | 0   | 2      | 1      | 1   | 1      | 1      | 3      | 1      |   |
| Cantius         | 1  | 1  | 1  | 1     | 2     | 2     | ?     | 0      | 0     | 1     | 0     | 1     | 0      | 0      | 0   | 0     | 1   | 2      | 0   | 0   | 0     | 0     | 1   | 3     | 2   | 2      | 2      | 0   | 2      | 1      | 1   | 1      | 1      | 3      | 0      |   |
| Donrussellia    | 1  | 1  | 1  | 1     | 2     | 2     | 2     | 0      | 0     | 0     | 1     | 0     | 0      | 0      | 0   | 1     | 1   | 0      | 0   | 0   | 0     | 0     | 1   | 3     | 2   | 2      | 2      | 0   | 2      | 2      | 1   | 1      | 3      | 1 & 2  |        |   |
| Leptadapis      | 1  | 1  | 1  | 1     | ?     | ?     | ?     | ?      | 0     | 2     | 0     | 1     | 0      | 2      | 0   | 0     | 1   | 0      | 0   | 0   | 0     | 0     | 1   | 2     | 1   | 3      | 2      | 0   | 2      | 1      | 2   | 1      | 2      | 1      | 1      |   |
| Mahgarita       | 1  | 1  | 1  | 1     | ?     | ?     | ?     | ?      | 0     | 0     | 0     | 1     | 0      | ?      | 0   | ?     | 1   | 0 or 1 | 0   | 0   | 0     | 0     | 1   | 3     | 2   | ?      | ?      | 1   | ?      | 1 or 2 | ?   | 1      | ?      | 2      |        |   |
| Aframionius     | 1  | 1  | 1  | 1     | 2     | ?     | ?     | ?      | 0     | 0     | 0     | 1     | 0      | 1      | 0   | 0     | 1   | 0      | 0   | 0   | 0     | 0     | 1   | 3     | 1   | 2 or 3 | 2 or 3 | 0   | 1      | 2      | 1   | 1      | 1      | 2 or 3 | 2 or 3 |   |
| Pronycticebus   | 1  | 1  | 2  | 1     | 2     | 0     | 0     | 0      | 1     | 0     | 0     | 0     | 0      | 0      | 0   | 0     | 1   | 1      | 0   | 0   | 0     | 0     | 1   | 3     | 2   | 3      | 3      | 0   | ?      | 1      | 1   | 1      | 2      | 0      |        |   |
| Protoadapis     | 1  | 1  | 2  | 1     | 1     | 1     | ?     | 0      | 0     | 1     | 0     | 1     | 0      | 0      | 0   | 0     | 1   | 1      | 0   | 0   | 0     | 0     | 1   | 3     | 2   | 3      | 3      | 1   | ?      | 1      | 2   | 1      | 3      | 1      |        |   |
| Percinodon      | 1  | 1  | 2  | 1 & 2 | ?     | ?     | ?     | ?      | 1     | 0     | 0     | 1     | 1 or 2 | 0      | 0   | 1     | 1   | 0      | 0   | 0   | 0     | 0     | 1   | 3     | 2   | 2 or 3 | 2 or 3 | 1   | 2      | 1      | 1   | 1      | 1      | 1      |        |   |
| Guangxilemur    | 1  | ?  | 1  | ?     | 1     | ?     | ?     | 0      | 0     | 1     | ?     | ?     | 0      | 1      | 0   | 0     | 1   | 0 or 1 | 0   | 1   | 0     | ?     | 3   | 1     | 0   | 0      | ?      | 0   | 1      | 1      | 1   | 0      | 0      |        |        |   |
| Hoanghoni       | 1  | 1  | 1  | 1     | 2     | 1     | ?     | 0      | 0     | 1     | 0     | 1     | 0      | 1      | 0   | 0     | 1   | 1      | 0   | 0   | 0     | 0     | 1   | 3     | 1   | 0      | 0      | 0   | 0      | 1      | 1   | 1      | 1      | 1      |        |   |
| Sivaladapis     | 1  | 1  | 1  | 2     | 2     | 1     | 1     | 0 or 1 | 0     | 2     | 0     | 1     | 0      | 2      | 0   | 0     | 1   | 1      | 0   | 0   | 0     | 0     | 1   | 3     | 1   | 0      | 0      | 0   | 0      | 1      | 1   | 1      | 1      | 3      | 1      |   |
| Galagoides      | 1  | 1  | 1  | 1     | ?     | ?     | ?     | ?      | 0     | 0     | 0     | 1     | 0      | 0      | 0   | 0     | 1   | 0      | 0   | 0   | 0     | 0     | 1   | 3     | 1   | 3      | 3      | 0   | ?      | 2      | 1   | 1      | 0      | 0      |        |   |
| Microcebus      | 1  | 1  | 1  | 1     | ?     | ?     | ?     | ?      | 0     | 0     | 0     | 1     | 0      | 1      | 0   | 0     | 1   | 0      | 0   | 0   | 0     | 0     | 1   | 3     | 2   | 3      | 3      | 0   | ?      | 1      | 1   | 1      | 0      | 0      |        |   |
| Nycticebus      | 1  | 1  | 1  | 0     | ?     | ?     | ?     | ?      | 0     | 0     | 0     | 1     | 0      | 1      | 0   | 0     | 1   | 0      | 0   | 0   | 0     | 0     | 1   | 3     | 2   | 3      | 3      | 0   | ?      | 1      | 1   | 1      | 2      | 2      |        |   |
| Lemur           | 1  | 1  | 2  | 2     | 1     | ?     | ?     | ?      | 0     | 2     | ?     | 0     | 0      | 2      | 0   | 0     | 1   | 1      | 0   | 0   | 0     | 0     | 1   | 3     | 2   | 3      | 3      | 3   | ?      | 1      | 1   | 1      | 0      | 0      |        |   |
| Absarokius      | 1  | 1  | 1  | 0 & 1 | 2     | 2     | 2     | 1      | 0     | 1     | 0     | 1     | 0 & 1  | 1      | 0   | 0     | 1   | 2      | 0   | 0   | 0     | 0     | 1   | 3     | 2   | 2      | 2      | 0   | 2      | 1      | 1   | 0 & 1  | 0      | 0      |        |   |
| Anaptomorphus   | 1  | 1  | 1  | 1     | 2     | 2     | 2     | 1      | 0     | 1     | 0     | 1     | 0      | 1      | 0   | 0     | 1   | 2      | 0   | 0   | 0     | 0     | 1   | 3     | 2   | 2      | 2      | 0   | 2      | 1      | 1   | 0 & 1  | 3      | 0      |        |   |
| Anemorhysis     | 1  | 1  | 1  | 1     | 2     | 2     | 2     | 1      | 0     | 0     | 0     | 1 & 2 | 0      | 1      | 0   | 0     | 1   | 2      | 0   | 0   | 0     | 0     | 1   | 3     | 2   | 3      | 3      | 0   | ?      | 2      | 1   | 0 & 1  | 3      | 0      |        |   |
| Arapahovius     | 1  | 1  | 1  | 1     | 2     | 2     | 2     | 1      | 0     | 1     | 0     | 2     | 2      | 1      | 0   | 0     | 1   | 2      | 0   | 0   | 0     | 0     | 1   | 3     | 2   | 2      | 2      | 0   | 1 & 2  | 2      | 1   | 1      | 3      | 1      |        |   |
| Dyseulemur      | 1  | 1  | 1  | 1     | 1     | 1     | 1     | 0      | 1     | 2     | 0     | 1     | 1 & 2  | 1      | 0   | 0     | 1   | 2      | 0   | 0   | 0     | 0     | 1   | 3     | 2   | 2      | 2      | 0   | 2      | 1      | 1   | 1      | 0      | 0      |        |   |
| Hemiacodon      | 1  | 1  | 2  | 1     | 2     | 2     | 1     | 1      | 0 & 1 | 0     | 0 & 1 | 1 & 2 | 2      | 1      | 0   | 0     | 1   | 2      | 0   | 0   | 0     | 0     | 1   | 3     | 1   | 2      | 2      | 0   | 1      | 2      | 1   | 1      | 0 or 1 | 1      | 0      |   |
| Loveina         | 1  | 1  | 2  | 1     | 1 & 2 | 1 & 2 | 1 & 2 | 0      | 0     | 1     | 0     | 1     | 0      | 1      | 0   | 0     | 1   | 2      | 0   | 0   | 0     | 0     | 1   | 3     | 2   | 2      | 2 & 3  | 0   | 1 & 2  | 2      | 1   | 1      | 0      | 0      |        |   |
| Macrotarsius    | 1  | 1  | 1  | 2     | 2     | 2     | 2     | 0      | 1     | 1     | 0     | 1     | 1      | 2      | 0   | 0 & 1 | 1   | 2      | 0   | 0   | 0     | 0     | 1   | 3     | 1   | 1      | 1      | 0   | 1      | 2      | 1   | 1      | 0      | 0      |        |   |
| Microchoerus    | 1  | 1  | 1  | 1     | 2     | ?     | ?     | ?      | 0     | 1     | 1     | 2     | 2      | 2      | 1   | 0     | 1   | 2      | 0   | 0   | 0     | 0     | 1   | 3     | 2   | 3      | 2      | 0   | 2      | 1      | 1   | 1      | 3      | 0      |        |   |
| Nannopithec     | 1  | 1  | 1  | 1     | 2     | 1     | 1     | 0      | 0     | 0     | 1     | 1     | 0 & 1  | 0 or 1 | 0   | 0     | 1   | 1      | 0   | 0   | 0     | 0     | 1   | 3     | 2   | 3      | 3      | 0   | ?      | 1      | 1   | 1      | 3      | 0      |        |   |
| Necrolemur      | 1  | 1  | 1  | 1     | 2     | ?     | ?     | ?      | 0     | 0     | 1     | 1     | 1      | 2      | 0   | 0     | 1   | 2      | 0   | 0   | 0     | 0     | 1   | 3     | 2   | 3      | 3      | 0   | 2      | 1      | 1   | 1      | 3      | 0      |        |   |
| Omomys          | 1  | 1  | 1  | 1     | 2     | 1     | 1     | 0      | 0     | 1     | 0     | 1     | 0      | 1      | 0   | 0     | 1   | 2      | 0   | 0   | 0     | 0     | 1   | 3     | 2   | 2 & 3  | 2 & 3  | 0   | 1 & 2  | 1      | 1   | 0 or 1 | 0      | 0      |        |   |
| Shoshonius      | 1  | 1  | 1  | 1     | 1 & 2 | 1 & 2 | 1 & 2 | 0      | 0 & 1 | 2     | 0     | 1 & 2 | 1 & 2  | 1 & 2  | 0   | 0     | 1   | 2      | 0   | 0   | 0     | 0     | 1   | 3     | 2   | 2      | 2      | 0   | 1      | 2      | 1   | 1      | 1      | 3      | 0      |   |
| Steinius        | 1  | 1  | 2  | 1     | 2     | 2     | 2     | 1      | 0     | 1     | 0     | 1     | 0      | 1      | 0   | 0     | 1   | 2      | 0   | 0   | 0     | 0     | 1   | 3     | 2   | 2 & 3  | 2 & 3  | 1   | 1 & 2  | 1      | 1   | 0      | 1      | 0      |        |   |
| Strigorhysis    | 1  | 1  | 1  | 1     | ?     | ?     | ?     | ?      | 0     | 0     | 2     | 2     | 1      | 0      | 0   | 0     | 1   | 2      | 0   | 0   | 0     | 0     | 1   | 3     | 2   | ?      | ?      | ?   | 2      | 1      | 1   | 0 & 1  | 0      | 0      |        |   |
| Teilhardina_a   | 1  | 1  | 1  | 0     | 2     | 2     | 2     | 1      | 0     | 1     | 0     | 1     | 0      | 0      | 0   | 0     | 1   | 2      | 0   | 0   | 0     | 0     | 1   | 3     | 2   | 2 & 3  | 2 & 3  | 0   | 2      | 2      | 1   | 0 & 1  | 1      | 0      |        |   |
| Teilhardina_b   | 1  | 1  | 1  | 0     | 2     | 2     | 2     | 1      | 0     | 1     | 0     | 1     | 0      | 0      | 0   | 0     | 1   | 2      | 0   | 0   | 0     | 0     | 1   | 3     | 2   | 2      | 2      | 0   | 2      | 2      | 1   | 0 & 1  | 1      | 0      |        |   |
| Tetonius        | 1  | 1  | 1  | 0     | 2     | 2     | 2     | 1      | 0     | 0     | 0     | 1     | 0      | 0      | 0   | 0     | 1   | 2      | 0   | 0   | 0     | 0     | 1   | 3     | 2   | 2      | 2      | 0   | 2      | 1      | 1   | 0 & 1  | 2      | 0      |        |   |
| Uintanius       | 1  | 1  | 1  | 1     | 1     | 1     | 1     | 0      | 0     | 1     | 0     | 1     | 0      | 0      | 0   | 0     | 1   | 2      | 0   | 0   | 0     | 0     | 1   | 3     | 2   | 2      | 2      | 0   | 2      | 2      | 1   | 1      | 0      | 0      |        |   |
| Washakius       | 1  | 1  | 1  | 1     | 1     | 1     | 1     | 0      | 0 & 1 | 1 & 2 | 1     | 2     | 2      | 1 & 2  | 0   | 0     | 1   | 2      | 0   | 0   | 0     | 0     | 1   | 3     | 2   | 1      | 1      | 0   | 1      | 2      | 1   | 1      | 2      | 0      | 0      |   |
| Atrotarsius     | 1  | 1  | 1  | 0     | 1     | 1     | 1     | 0      | 0     | 0     | 0     | 1     | 0      | 0      | 0   | 0     | 0   | 2      | 0   | 0   | 0     | 0     | 1   | 3     | 2   | 2      | 2      | 2   | 1      | 2      | 0   | 0      | 0      | 0      | 0      |   |
| Eosimias        | 1  | 1  | 1  | 0     | 2     | 1     | 1     | 0      | 0     | 0     | 0     | 1     | 0      | 0      | 0   | 0     | 1   | 2      | 0   | 0   | 0     | 0     | 1   | 1 & 2 | 2   | 1 & 2  | 1 & 2  | 1   | 1 or 2 | 2      | 1   | 1      | 0      | 0      | 0      |   |
| Phenacopithecus | 1  | 1  | 1  | 0     | 1     | 1     | 1     | 0      | 0     | 1     | 0     | 1     | 0      | 0      | 0   | 0     | 1   | 2      | 0   | 0   | 0     | 0     | 1   | 2     | 2   | 1 & 2  | 2      | 0   | 1      | 1      | 1   | 1      | 1      | 1      | 1      |   |
| Bahinia         | ?  | ?  | ?  | ?     | ?     | ?     | ?     | ?      | 0     | 0     | 1     | ?     | ?      | 0      | 0   | 0     | 1   | 2      | 0   | 0   | ?     | ?     | 1   | 1     | 2   | 3      | ?      | ?   | ?      | ?      | 1   | 1      | ?      | 0      | ?      |   |
| Tarsius         | 1  | 1  | 1  | 0 & 1 | 1     | 1     | 1     | 0      | 0     | 0     | 1     | 0     | 0      | 0      | 0   | 0     | 1   | 2      | 0   | 0   | 0     | 0     | 1   | 2 & 3 | 2   | 2 or 3 | 2 or 3 | 1   | 1      | 2      | 0   | 0      | 0      | 0      | 0      |   |
| Xanthorhysis    | 1  | 1  | 1  | 1     | 1     | 1     | 1     | 0      | 0     | 0     | 0     | 1     | 0      | 0      | 0   | 0     | 1   | 1      | 0   | 0   | 0     | 0     | 1   | 3     | 2   | 3      | 3      | 0   | ?      | 2      | 0   | 0      | 0      | 0      |        |   |
| Aegyptopithecus | 1  | 1  | 1  | 1     | ?     | ?     | ?     | ?      | 0     | 1     | 0     | 1     | 0      | 2      | 1   | 1     | 0   | 0      | 0   | 0   | 0 & 1 | 0 & 1 | 0   | 3     | 0   | 0      | 0      | 0   | 1      | 0      | 0   | 0      | 0      | 0      | 0      |   |
| Moeripithecus   | 1  | 1  | 1  | 1     | ?     | ?     | ?     | ?      | 0     | 1     | 0     | 1     | 0      | 2      | 1   | 1     | 0   | 0      | 0   | 0   | 0     | 0     | 0   | 2     | 0   | 0      | 0      | 0   | 0      | 1      | 0   | 1      | 0      | 1      | 0      | 0 |
| Apidium         | 1  | 1  | 1  | 1     | 1     | ?     | ?     | ?      | 0     | 1     | 0     | 2     | 0      | 2      | 1   | 1     | 1   | 0      | 1   | 1   | 1     | 1     | 0   | 3     | 0   | 0      | 0      | 0   | 1      | 1      | 0   | 1      | 0      | 0      | 0      | 0 |
| Arsinoea        | 1  | 1  | 1  | 0     | 2     | 2     | ?     | ?      | 1     | 0     | 1     | 0     | 1      | 0      | 1   | 0     | 1   | 1      | 0   | 0   | 0     | 0     | 1   | 2     | 1   | 1      | 1      | 1   | 1      | 1      | 0   | 0      | 0      | 0      | 0      | 0 |
| Catopithecus    | 1  | 1  | 1  | 1     | 1     | ?     | ?     | ?      | 1     | 0     | 1     | 0     | 1      | 0      | 1   | 0     | 1   | 0      | 0   | 0   | 0     | 0     | 1   | 3     | 1   | 1      | 1      | 1   | 0      | 1      | 0   | 0      | 0      | 0      | 0      | 0 |

| TAXA            | 100 | 101 | 102    | 103 | 104 | 105 | 106 | 107 | 108    | 109    | 110 | 111 | 112 | 113 | 114 | 115 | 116  | 117    | 118 | 119 | 120 | 121 | 122    | 123 | 124 | 125    | 126 | 127 | 128 | 129 | 130 | 131 | 132 |        |
|-----------------|-----|-----|--------|-----|-----|-----|-----|-----|--------|--------|-----|-----|-----|-----|-----|-----|------|--------|-----|-----|-----|-----|--------|-----|-----|--------|-----|-----|-----|-----|-----|-----|-----|--------|
|                 | m36 | m37 | m38    | m39 | m40 | m41 | m42 | m43 | m44    | m45    | m46 | m47 | m53 | m55 | m56 | m57 | ML88 | I1     | I2  | I3  | I4  | I5  | I6     | I7  | I8  | I9     | I10 | I11 | I12 | I13 | C1  | C2  | C3  |        |
| Scandentia      | 0   | 2   | 2      | 1   | 1   | 0   | 0   | 1   | 0      | 2      | 2   | 2   | ?   | ?   | 1   | 0   | 1    | 0      | ?   | ?   | 0   | 1   | 2      | ?   | ?   | ?      | ?   | ?   | ?   | 0   | ?   | 0   |     |        |
| Paromomys       | 0   | 2   | 2      | 1   | 2   | 0   | 0   | 1   | 1      | 1&2    | 2   | 1   | 1   | 2   | 1   | 1   | 1    | ?      | ?   | ?   | ?   | ?   | ?      | ?   | ?   | ?      | ?   | ?   | ?   | ?   | ?   | ?   |     |        |
| Plesiadapis     | 0   | 2   | 2      | 2   | 2   | 0   | 0   | 1   | 1      | 1      | 2   | 2   | 0   | 2   | 1   | 1   | 0    | ?      | ?   | ?   | ?   | ?   | ?      | ?   | ?   | ?      | ?   | ?   | ?   | ?   | ?   | ?   |     |        |
| Plesiolestes    | 0   | 2   | 2      | 2   | 1   | 0   | 0   | 1   | 1      | 2      | 2   | 2   | 0   | 3   | 1   | 0   | 0    | ?      | ?   | ?   | ?   | ?   | ?      | ?   | ?   | ?      | ?   | ?   | ?   | ?   | ?   | ?   |     |        |
| Purgatorius     | 3   | 2   | 2      | 2   | 2   | 0   | 0   | 1   | 0      | 1      | 2   | 2   | 2   | 3   | 0   | 0   | 0    | ?      | ?   | ?   | ?   | ?   | ?      | ?   | ?   | ?      | ?   | ?   | ?   | ?   | ?   | ?   |     |        |
| Adapis          | 1   | 2   | 2      | 2   | 0   | 0   | 0   | 1   | 1      | 1      | 2   | 2   | 0   | 3   | 1   | 1   | 0    | 1      | 0   | ?   | ?   | 0   | ?      | 2   | 2   | 0      | ?   | ?   | ?   | 1   | 0   | 0   | ?   |        |
| Notharctus      | 1   | 2   | 2      | 2   | 2   | 0   | 0   | 1   | 1      | 2      | 2   | 2   | 0   | 1&2 | 0   | 1   | 1    | ?      | ?   | ?   | ?   | ?   | ?      | ?   | ?   | 0 or 1 | 0   | ?   | ?   | ?   | ?   | ?   | 0   |        |
| Cantius         | 1   | 2   | 2      | 2   | 2   | 0   | 0   | 1   | 1      | 2      | 2   | 2   | 0   | 2   | 3   | 0   | 1    | 1      | ?   | ?   | ?   | ?   | ?      | ?   | ?   | ?      | ?   | ?   | ?   | ?   | ?   | ?   | ?   |        |
| Donrussellia    | 1   | 2   | 2      | 2   | 1   | 0   | 0   | 1   | 0&1    | 1      | 2   | 2   | 0&1 | 2   | 3   | 1   | 0    | 1      | ?   | ?   | ?   | ?   | ?      | ?   | ?   | ?      | ?   | ?   | ?   | ?   | ?   | ?   | ?   |        |
| Leptadapis      | 1   | 2   | 2      | 2   | 0   | 0   | 0   | 1   | 0      | 2      | 2   | 2   | 0   | 3   | 0   | 1   | 1    | ?      | ?   | ?   | ?   | ?   | ?      | ?   | ?   | 0      | ?   | ?   | ?   | ?   | ?   | 0   | ?   |        |
| Mahgarita       | 2   | 2   | 2      | 2   | 2   | 0   | 0   | 1   | 0      | 1      | 2   | 2   | 1   | 3   | ?   | 1   | 0    | ?      | ?   | ?   | ?   | ?   | ?      | ?   | ?   | ?      | ?   | ?   | ?   | ?   | 0   | 2   | 1   |        |
| Aframionius     | 1   | 2   | 2      | 2   | 0   | 0   | 0   | 1   | 0      | 0      | 2   | 2   | 1   | 3   | 1   | 1   | 0    | ?      | ?   | ?   | ?   | ?   | ?      | ?   | ?   | ?      | ?   | ?   | ?   | ?   | ?   | ?   | ?   |        |
| Pronycticebus   | 1   | 2   | 2      | 2   | 1   | 0   | 0   | 1   | 0      | 1      | 2   | 2   | 0   | 2   | 1   | 1   | 1    | ?      | ?   | ?   | ?   | ?   | ?      | ?   | ?   | ?      | ?   | ?   | ?   | ?   | 0   | ?   | ?   |        |
| Protoadapis     | 1   | 2   | 2      | 2   | 2   | 0   | 0   | 1   | 1      | 1      | 2   | 2   | 0   | 2   | 1   | 1   | 1    | ?      | ?   | ?   | ?   | ?   | ?      | ?   | ?   | ?      | ?   | ?   | ?   | ?   | ?   | ?   | ?   |        |
| Percinodan      | 1   | 2   | 2      | 2   | 1   | 1   | 0   | 1   | 1      | 2      | 2   | 2   | 0   | 2   | 1   | 0   | 0    | ?      | ?   | ?   | ?   | ?   | ?      | ?   | ?   | ?      | ?   | ?   | ?   | ?   | ?   | ?   | ?   |        |
| Guangxilemur    | ?   | 2   | 2      | ?   | 0   | 0   | 0   | 1   | 1      | 1      | 1   | 1   | ?   | 3   | 1   | 0   | 1    | ?      | ?   | ?   | ?   | ?   | ?      | ?   | ?   | ?      | ?   | ?   | ?   | ?   | ?   | ?   | ?   |        |
| Hoanghoni       | 1   | 2   | 2      | 2   | 1   | 0   | 0   | 1   | 1      | 2      | 2   | 2   | 2   | 3   | 1   | 0   | 1    | ?      | ?   | ?   | ?   | ?   | ?      | ?   | ?   | ?      | ?   | ?   | ?   | ?   | ?   | ?   | ?   |        |
| Sivaladapis     | 1   | 2   | 2      | 2   | 0   | 1   | 0   | 1   | 1      | 1      | 2   | 2   | 2   | 3   | 1   | 0   | 0    | ?      | ?   | ?   | ?   | ?   | ?      | ?   | ?   | ?      | ?   | ?   | ?   | ?   | ?   | ?   | ?   |        |
| Galagoides      | 0   | 2   | 2      | 2   | 2   | 1   | 0   | 1   | 0      | 0      | 2   | 2   | 1   | 1   | 1   | 0   | 1    | 0      | 1   | 1   | 0   | 0   | 0      | 0   | 1   | 0      | ?   | 0   | 0   | 0   | 0   | 1   | 0   |        |
| Microcebus      | 0   | 2   | 2      | 2   | 2   | 0   | 0   | 1   | 0      | 1      | 2   | 2   | 0   | 1   | 1   | 0   | 1    | 0      | 1   | 1   | 1   | 2   | 0      | 1   | 0   | 1      | 0   | 0   | 2   | 1   | 0   | 0   | 1   | 0      |
| Nycticebus      | 2   | 2   | 2      | 2   | 2   | 0   | 0   | 1   | 1      | 0      | 2   | 2   | 1   | 2   | 0   | 0   | 1    | 0      | 1   | 0   | 1   | 0   | 2      | 0   | 1   | 1      | 1   | 0   | 0   | 0   | 0   | 0   | 1   | 0      |
| Lemur           | 0   | 2   | 2      | 2   | 0   | 0   | 0   | 1   | 1      | 0      | 2   | 2   | 2   | 3   | 0   | 1   | 0    | 0      | 1   | 0   | ?   | ?   | ?      | ?   | ?   | ?      | ?   | ?   | ?   | ?   | ?   | 0   | 1   | ?      |
| Absarokius      | 1   | 2   | 1      | 1   | 2   | 0   | 0   | 1   | 1      | 2      | 2   | 2   | 2   | 0   | 0   | 0   | 1    | ?      | ?   | ?   | ?   | ?   | ?      | ?   | ?   | ?      | ?   | ?   | ?   | ?   | ?   | ?   | ?   | ?      |
| Anaptomorphus   | 2   | 2   | 1      | 1   | 1   | 0   | 0   | 1   | 1      | 0&1    | 2   | 1&2 | 2   | 2   | 0   | 0   | 1    | ?      | ?   | ?   | ?   | ?   | ?      | ?   | ?   | ?      | ?   | ?   | ?   | ?   | ?   | ?   | ?   | ?      |
| Anemorphys      | 0   | 2   | 2      | 1   | 2   | 0   | 0   | 1   | 1      | 2      | 2   | 1   | 1   | 1&2 | 1   | 0   | 1    | ?      | ?   | ?   | ?   | ?   | ?      | ?   | ?   | ?      | ?   | ?   | ?   | ?   | ?   | ?   | ?   | ?      |
| Arapahovius     | 1   | 2   | 2      | 2   | 2   | 0   | 0   | 1   | 0      | 2      | 2   | 2   | 1   | 1   | 0&1 | 0   | 1    | ?      | ?   | ?   | ?   | ?   | ?      | ?   | ?   | ?      | ?   | ?   | ?   | ?   | ?   | ?   | ?   | ?      |
| Dyseolemur      | 0   | 2   | 2      | 2   | 0   | 0   | 0   | 1   | 1&2    | 2      | 2   | 2   | 0   | 0   | 0   | 0   | 0    | 1      | 0   | ?   | ?   | 1   | 0      | 0   | 0   | 2      | 0   | ?   | 1   | 0   | 0   | 1   | 1   | 0      |
| Hemiacodon      | 1   | 2   | 2      | 2   | 1   | 0   | 0   | 0   | 1      | 2      | 2   | 1&2 | 1   | 2   | 1   | 0   | 1    | ?      | ?   | ?   | ?   | ?   | ?      | ?   | ?   | ?      | ?   | ?   | ?   | ?   | ?   | ?   | ?   | ?      |
| Loveina         | 0   | 2   | 2      | 2   | 1   | 0   | 0   | 1   | 1      | 1&2    | 2   | 2   | 0   | 2   | 0   | 0   | 0    | ?      | ?   | ?   | ?   | ?   | ?      | ?   | ?   | ?      | ?   | ?   | ?   | ?   | ?   | ?   | ?   | ?      |
| Macrotarsius    | 1   | 2   | 2      | 2   | 2   | 0   | 0   | 1   | 1      | 1      | 2   | 2   | 0   | 1   | 0   | 0   | 2    | ?      | ?   | ?   | ?   | ?   | ?      | ?   | ?   | ?      | ?   | ?   | ?   | ?   | ?   | ?   | ?   | ?      |
| Microchoerus    | 2   | 1   | 2      | 2   | 0   | 0   | 0   | 1   | 1      | 2      | 2   | 2   | 1   | 0   | 1   | 0   | 0    | 1      | 1   | 1   | 1   | 2   | 2      | 0   | 0   | 2      | 1   | ?   | 0   | 1   | 0   | 0   | 3   | 0      |
| Nannopithec     | 2   | 2   | 2      | 2   | 0   | 0   | 0   | 1   | 1      | 2      | 2   | 2   | 1   | 2   | 1   | 0   | 1    | 1      | 1   | 1   | 1   | 2   | 2      | ?   | ?   | 2      | 0   | ?   | ?   | 1   | ?   | 0   | 3   | 0      |
| Necrolemur      | 2   | 2   | 2      | 2   | 0   | 0   | 0   | 1   | 1      | 2      | 2   | 2   | 1   | 1   | 1   | 0   | 0    | 1      | 1   | 1   | 1   | 2   | 2      | ?   | ?   | 2      | ?   | ?   | ?   | ?   | ?   | ?   | ?   | ?      |
| Omomys          | 0   | 2   | 2      | 2   | 1   | 0   | 0   | 1   | 1      | 1      | 2   | 1   | 1   | 2   | 1   | 0   | 1    | 1      | ?   | ?   | ?   | ?   | ?      | ?   | ?   | ?      | ?   | ?   | ?   | ?   | ?   | ?   | ?   | ?      |
| Shoshonius      | 0   | 2   | 2      | 2   | 1   | 0   | 0   | 1   | 1      | 1      | 2   | 2   | 0   | 2   | 0   | 0   | 1    | ?      | ?   | ?   | ?   | ?   | ?      | ?   | ?   | ?      | ?   | ?   | ?   | ?   | ?   | ?   | ?   | ?      |
| Steinius        | 1   | 2   | 2      | 2   | 1   | 0   | 0   | 1   | 0      | 2      | 2   | 1   | 0   | 2   | 1   | 0   | 1    | ?      | ?   | ?   | ?   | ?   | ?      | ?   | ?   | ?      | ?   | ?   | ?   | ?   | ?   | ?   | ?   | 0 or 1 |
| Strigorhysis    | ?   | 2   | 2      | 2   | 0   | 0   | 0   | 1   | 2      | 0&1    | 2   | 1&2 | 1&2 | 0   | 0   | 0   | 1    | ?      | ?   | ?   | ?   | ?   | ?      | ?   | ?   | ?      | ?   | ?   | ?   | ?   | ?   | ?   | ?   | ?      |
| Teilhardina_a   | 0   | 2   | 2      | 2   | 2   | 0   | 0   | 1   | 1      | 1&2    | 2   | 2   | 1   | 2   | 0&1 | 0   | 1    | ?      | ?   | ?   | ?   | ?   | ?      | ?   | ?   | ?      | ?   | ?   | ?   | ?   | ?   | ?   | ?   | ?      |
| Teilhardina_b   | 0   | 2   | 2      | 2   | 2   | 0   | 0   | 1   | 1      | 1      | 2   | 2   | 1   | 2   | 0&1 | 0   | 1    | ?      | ?   | ?   | ?   | ?   | ?      | ?   | ?   | ?      | ?   | ?   | ?   | ?   | ?   | ?   | ?   | ?      |
| Tetonius        | 0   | 2   | 2      | 2   | 2   | 0   | 1   | 1   | 1&2    | 0&1    | 2   | 1&2 | 2   | 0   | 0   | 0   | 1    | 1 or 2 | 0   | 1   | 2   | 2   | 1 or 2 | ?   | ?   | 1      | ?   | ?   | ?   | ?   | ?   | ?   | ?   | ?      |
| Uintanius       | 0   | 2   | 2      | 2   | 2   | 0   | 0   | 1   | 1      | 1 or 2 | 2   | 1   | 1   | 2   | 0   | 0   | 1    | ?      | ?   | ?   | ?   | ?   | ?      | ?   | ?   | ?      | ?   | ?   | ?   | ?   | ?   | ?   | ?   | ?      |
| Washakius       | 1   | 1   | 2      | 2   | 0   | 0   | 0   | 1   | 1      | 1      | 2   | 2   | 0   | 2   | 0   | 0   | 0    | ?      | ?   | ?   | ?   | ?   | ?      | ?   | ?   | ?      | ?   | ?   | ?   | ?   | ?   | ?   | ?   | ?      |
| Atrotarsius     | 0   | 2   | 2      | 2   | 1   | 0   | 0   | 1   | 0      | 2      | 2   | 2   | 2   | 1   | 1   | 0   | 1    | ?      | ?   | ?   | ?   | ?   | ?      | ?   | ?   | ?      | ?   | ?   | ?   | ?   | ?   | ?   | ?   | ?      |
| Eosimias        | 0   | 2   | 2      | 2   | 1   | 0   | 0   | 1   | 0      | 1      | 1   | 1   | 1   | 3   | 1   | 0   | 1    | ?      | ?   | ?   | ?   | ?   | ?      | ?   | ?   | ?      | ?   | ?   | ?   | ?   | ?   | ?   | ?   | ?      |
| Phenacopithecus | 1   | 2   | 2      | 2   | 1   | 0   | 0   | 1   | 0      | 1      | 1   | 1   | 1   | 3   | 1   | 0   | 1    | ?      | ?   | ?   | ?   | ?   | ?      | ?   | ?   | ?      | ?   | ?   | ?   | ?   | ?   | ?   | ?   | ?      |
| Bahinia         | ?   | 2   | 2      | ?   | 2   | 0   | 0   | 1   | 0      | 0      | 1   | ?   | ?   | 2   | 1   | 0   | 1    | ?      | ?   | ?   | ?   | ?   | ?      | ?   | ?   | ?      | ?   | ?   | ?   | ?   | ?   | ?   | ?   | ?      |
| Tarsius         | 0   | 2   | 1      | 1   | 2   | 0   | 0   | 1   | 0 or 1 | 2      | 1   | 1   | 1   | 1   | 0   | 0   | 1    | 2      | 0   | 0   | 2   | 0   | 0      | 1   | 2   | 0      | ?   | ?   | ?   | ?   | ?   | ?   | ?   | ?      |
| Xanthorhysis    | 0   | 2   | 2      | 2   | 1   | 0   | 0   | 1   | 1      | 2      | 2   | 1   | 2   | 2   | 0   | 0   | 1    | ?      | ?   | ?   | ?   | ?   | ?      | ?   | ?   | ?      | ?   | ?   | ?   | ?   | ?   | ?   | ?   | ?      |
| Aegyptopithecus | 1   | 2   | 1      | 1   | 1   | 2   | 0   | 1   | 1      | 1      | 1   | 0   | 1   | 0   | 0   | 0   | 2    | ?      | ?   | ?   | ?   | ?   | ?      | ?   | ?   | ?      | ?   | ?   | ?   | ?   | ?   | ?   | ?   | ?      |
| Moeripithecus   | 1   | 2   | 1      | 1   | 2   | 0   | 0   | 1   | 1      | 1      | 1   | 0   | 2   | 0   | 0   | 0   | 1    | ?      | ?   | ?   | ?   | ?   | ?      | ?   | ?   | ?      | ?   | ?   | ?   | ?   | ?   | ?   | ?   | ?      |
| Apidium         | 0   | 0   | 1      | 1   | 1   | 0   | 1   | 1   | 2      | 1      | 2   | 1   | 2   | 0   | 0   | 0   | 0    | ?      | ?   | ?   | ?   | ?   | ?      | ?   | ?   | ?      | ?   | ?   | ?   | ?   | ?   | ?   | ?   | ?      |
| Arsinoea        | 1   | 2   | 1      | 1   | 2   | 0   | 0   | 1   | 2      | 0      | 1   | 1   | 3   | 1   | 0   | 0   | 1    | ?      | ?   | ?   | ?   | ?   | ?      | ?   | ?   | ?      | ?   | ?   | ?   | ?   | ?   | ?   | ?   | ?      |
| Catopithecus    | 0   | 2   | 1      | 1   | 2   | 0   | 0   | 1   | 0      | 1      | 1   | 0   | 3   | 0   | 1   | 0   | 1    | 1      | 0   | 0   | 0   | 0   | 0      | 1   | 1   | 0      | 0   | 0   | 2   | 0   | 0   | 0   | 3   | 1      |
| Oligopithecus   | 0   | 2   | 1      | 1   | 2   | 0   | 0   | 1   | 0      | 0      | 1   | 1   | 3   | 1   | 1   | 0   | 1    | ?      | ?   | ?   | ?   | ?   | ?      | ?   | ?   | ?      | ?   | ?   | ?   | ?   | ?   | ?   | ?   | ?      |
| Parapithecus    | 0   | 2   | 1      | 1   | 1   | 2   | 0   | 1   | 2      | 1      | 2   | 1   | 2   | 0   | 0   | 0   | 0    | ?      | ?   | ?   | ?   | ?   | ?      | ?   | ?   | ?      | ?   | ?   | ?   | ?   | ?   | ?   | ?   | ?      |
| Proteopithecus  | 0   | 2   | 2      | 2   | 1   | 0   | 0   | 1   | 1      | 1      | 1   | 1   | 3   | 0   | 1   | 0   | 2    | ?      | ?   | ?   | ?   | ?   | ?      | ?   | ?   | ?      | ?   | ?   | ?   | ?   | ?   | ?   | ?   | ?      |
| Qatrania        | 0   | 2   | 0 or 1 | 1   | 1   | 2   | 0   | 1   | 2      | 1      | 2   | 1   | 0   | 1   | 0   | 0   | 1    | ?      | ?   | ?   | ?   | ?   | ?      | ?   | ?   | ?      | ?   | ?   | ?   | ?   | ?   | ?   | ?   | ?      |
| Serapia         | 0   | 2   | 2      | 1   | 0   | 1   | 0   | 1   | 1      | 1      | 1   | 1   | 3   | 0   | 0   | 0   | 0    | ?      | ?   | ?   | ?   | ?   | ?      | ?   | ?   | ?      | ?   | ?   | ?   | ?   | ?   | ?   | ?   | ?      |
| Simonsius       | 0   | 2   | 1      | 1   | 1   | 1   | 0   | 1   | 1      | 1      | 1</ |     |     |     |     |     |      |        |     |     |     |     |        |     |     |        |     |     |     |     |     |     |     |        |

| TAXA            | 133 | 134 | 135 | 136 | 137    | 138    | 139 | 140   | 141 | 142   | 143   | 144 | 145 | 146  | 147    | 148   | 149   | 150    | 151 | 152   | 153   | 154   | 155   | 156   | 157 | 158 | 159   | 160   | 161   | 162    | 163 | 164    |        |        |        |
|-----------------|-----|-----|-----|-----|--------|--------|-----|-------|-----|-------|-------|-----|-----|------|--------|-------|-------|--------|-----|-------|-------|-------|-------|-------|-----|-----|-------|-------|-------|--------|-----|--------|--------|--------|--------|
| TAXA            | C4  | P1  | P2  | P3  | P4     | P5     | P6  | P7    | P8  | P9    | P10   | P11 | P12 | P13' | P14    | P15   | P16   | P17    | P18 | P19   | P20   | P21   | ML126 | ML127 | M1  | M2  | M3    | M4    | M5    | M7'    | M9  | M10    | M11    |        |        |
| Scandentia      | 0   | 1   | 2   | 2   | 0      | 0      | 2   | 0     | 0   | 1     | 0     | 0   | 1   | 0    | 2      | 0     | 1     | 0      | 1   | 0     | 0     | ?     | 0     | 0     | 0   | 0   | 2     | 0     | 0     | 0      | 1   | 1      |        |        |        |
| Paromomys       | ?   | 1   | 2   | 2   | ?      | 1      | ?   | 2     | 1   | 1     | 1     | ?   | ?   | ?    | 1 or 2 | 0     | 0     | 0      | 0   | 0     | 0     | 0     | 0     | 0     | 0   | 0   | 1     | 2     | ?     | 1      | 0   | 2      | 2      |        |        |
| Plesiadapis     | ?   | 2   | 2   | 2   | 0      | 1      | 2   | 1     | 0   | 0     | 1     | 1   | 1   | 0    | 0      | 0     | 1     | 0      | 0   | 0     | 0     | 1     | 0     | 0     | 0   | 0   | 0     | 2     | 2     | 1      | 0   | 2      | 2      |        |        |
| Plesiolestes    | ?   | ?   | ?   | 2   | ?      | 2      | ?   | 0     | 1   | ?     | 1     | 1   | ?   | 0    | 1      | 0     | 0     | 1      | ?   | ?     | ?     | ?     | 0     | 0     | 0   | 0   | 1     | 2     | 2     | 1      | 0   | 2      | 2      |        |        |
| Purgatorius     | ?   | ?   | ?   | 2   | ?      | 1      | ?   | 0     | 0   | ?     | 1     | 1   | ?   | 0    | 2      | 0     | 0     | 0      | ?   | ?     | ?     | ?     | 0     | ?     | 0   | ?   | 0     | 2     | 1     | 1      | 0   | 1      | 1      |        |        |
| Adapis          | ?   | 1   | 2   | 2   | 1      | 1      | 2   | 2     | 0   | 1     | 1     | 1   | 1   | 0    | 1      | 1     | 0     | 1      | 0   | 1     | 0     | 1     | 0     | 0     | 0   | 0   | 2     | 2     | 0     | 0      | 0   | 0      | 1      |        |        |
| Notharctus      | ?   | 0   | 2   | 2   | 0 or 1 | 1      | 2   | 1     | 0   | 0     | 0     | 1   | 1   | 0    | 1      | 0 & 1 | 0 & 1 | 0      | 1   | 0     | 0     | 1     | 0     | 0     | 0   | 0   | 0     | 2     | 2     | 1      | 1   | 0      | 0      | 0      |        |
| Cantius         | ?   | ?   | 2   | 2   | ?      | 1      | ?   | 1     | 0   | 0     | 0     | 1   | ?   | 0    | 2      | 0     | 0     | 0      | 1   | 0     | 0     | 1     | 0     | 0     | 0   | 0   | 1     | 2     | ?     | 1      | 0   | 2      | 2      |        |        |
| Donrussellia    | ?   | ?   | ?   | 2   | ?      | 1      | ?   | 1     | 0   | 0     | 0     | 1   | ?   | 0    | 2      | 1     | 1     | 0      | 1   | 0     | 0     | 1     | 0     | 0     | 0   | 0   | 1     | 2     | 0     | 0 or 1 | 0   | 2      | 2      |        |        |
| Leptadapis      | ?   | 1   | 2   | 2   | 0      | 2      | 2   | 2     | 1   | 0     | 0     | 1   | 1   | 0    | 0      | 2     | 0     | 0      | 1   | 0     | 1     | 0     | 1     | 0     | 0   | 0   | 0     | 2     | 2     | 1      | 0   | 0      | 0      | 1      |        |
| Mahgarita       | 1   | 0   | 2   | 2   | 0      | 1      | 3   | 1     | 0   | 0     | 0     | 1   | 1   | 0    | 1      | 1     | 1     | 0      | 1   | 1     | 0     | 1     | 0     | 0     | 0   | 0   | 2     | 2     | 0     | 1      | 0   | 0      | 0      | 0      |        |
| Aframionius     | ?   | 0   | 2   | 2   | 0      | 1      | 3   | 0     | 0   | 1     | 0     | 0   | 1   | 0    | 2      | 0     | 1     | 0      | 1   | 0     | 0     | 1     | 0     | 0     | 0   | 0   | 0     | 2     | 2     | 0      | 1   | 0      | 0      | 0      |        |
| Pronycticebus   | ?   | 2   | 2   | 2   | ?      | 0      | ?   | 1     | 0   | 0     | 0     | 1   | ?   | ?    | 2      | 0     | 0     | 1      | 1   | 0     | 0     | 0     | 0     | 0     | 0   | 0   | 1     | 2     | 0     | 1      | 0   | 0      | 1      |        |        |
| Protoadapis     | ?   | ?   | 2   | 2   | ?      | 1      | ?   | 1     | 0   | ?     | 0     | 1   | ?   | ?    | 2      | 1     | 0     | 0      | 0   | 0     | 0     | 1     | 0     | 0     | 0   | ?   | 2     | 2     | 0     | 0      | 0   | 1      | 1      | 0 or 1 |        |
| Periconodon     | ?   | ?   | ?   | ?   | ?      | ?      | ?   | ?     | ?   | ?     | ?     | ?   | ?   | ?    | ?      | ?     | ?     | ?      | ?   | ?     | ?     | ?     | ?     | ?     | ?   | 0   | 0     | 1     | 2     | ?      | 1   | 0      | 0      | 1      | 0 or 1 |
| Guangxilemur    | ?   | ?   | ?   | 2   | ?      | 1      | ?   | 2     | ?   | ?     | 1     | 1   | ?   | 1    | 1      | 0     | 0     | 0      | 0   | 1     | ?     | 1     | 0     | ?     | 0   | ?   | 1     | 2     | ?     | 0      | 0   | 1      | 1      | 1      |        |
| Hoanghoni       | ?   | ?   | ?   | ?   | ?      | ?      | ?   | ?     | ?   | ?     | ?     | ?   | ?   | ?    | ?      | ?     | ?     | ?      | ?   | ?     | ?     | ?     | ?     | ?     | ?   | 0   | ?     | 1     | ?     | ?      | 1   | 0      | ?      | ?      | 1      |
| Sivaladapis     | ?   | ?   | ?   | 2   | ?      | 2      | ?   | 2     | 0   | 1     | 1     | 1   | ?   | 0    | 2      | 0     | 1     | 0      | ?   | ?     | ?     | ?     | ?     | ?     | 0   | 0   | 2     | 2     | ?     | 1      | 0   | 2      | 2      | 2      |        |
| Galagoides      | 0   | 1   | 2   | 2   | 1      | 1      | 1   | 1     | 1   | 0     | 1     | 0   | 1   | 0    | 1      | 1     | 0     | 0      | 1   | 0     | 0     | 0     | 2     | 0     | 0   | 0   | 1     | 1     | 0     | 0      | 0   | 0      | 0      | 0      |        |
| Microcebus      | 1   | 0   | 2   | 2   | 0      | 1      | 3   | 0     | 0   | 1     | 0     | 0   | 1   | 0    | 2      | 0     | 0     | 1      | 0   | 1     | 0     | 1     | 0     | 0     | 0   | 0   | 1     | 2     | 0     | 0      | 0   | 0      | 1      | 1      |        |
| Nycticebus      | 0   | 0   | 2   | 2   | 2      | 0      | 3   | 1     | 1   | 0     | 0     | 0   | 1   | 0    | 2      | 0     | 1     | 1      | 1   | 1     | 0     | 0     | 0     | 0     | 0   | 0   | 1     | 1     | 0     | 0      | 0   | 0      | 0      | 1      |        |
| Lemur           | ?   | 1   | 2   | 2   | 0      | 1      | 1   | 0     | 0   | 1     | 0     | 0   | 1   | 0    | 2      | 0     | 0     | 1      | 1   | 0     | 0     | 0     | 0     | 0     | 0   | 0   | 2     | 1     | 0     | 0      | 0   | 1      | 1      | 1      |        |
| Absarokius      | ?   | 0   | 2   | 2   | 0      | 3      | 3   | 1     | 0   | 0     | 0     | 0   | 1   | 0    | 2      | 0 & 1 | 1     | 0      | 1   | 0     | 0     | 0     | 0     | 0     | 0   | 0   | 0     | 2     | 1     | 1      | 0   | 0      | 2      | 2      |        |
| Anaptomorphus   | ?   | ?   | ?   | 2   | ?      | ?      | ?   | 1     | 0   | ?     | 0     | 0   | ?   | 0    | 2      | 0     | 0     | ?      | ?   | ?     | ?     | ?     | ?     | ?     | ?   | 0   | 0     | 2     | 1     | 1      | 0   | 2      | 2      | 2      |        |
| Anemorhysis     | ?   | ?   | 2   | 2   | ?      | 1      | ?   | 1     | 0   | 0     | 0     | 0   | ?   | ?    | 2      | 1     | 1     | 1      | 1   | 0     | 0     | 1     | 0     | 0     | 0   | 0   | 0     | 2     | ?     | 1      | 0   | 2      | 2      | 2      |        |
| Arapahovius     | ?   | 0   | 2   | 2   | 0      | 0      | 2   | 1     | 1   | 0     | 0     | 0   | 1   | 0    | 2      | 0     | 1     | 0      | 1   | 0     | 0     | 1     | 0     | 0     | 0   | 0   | 0     | 2     | 1 & 2 | 1      | 0   | 2      | 2      | 2      |        |
| Dysecollemur    | 2   | 0   | 2   | 2   | 2      | 0      | 3   | 1     | 0   | 0     | 0     | 0   | 1   | 0    | 2      | 0     | 0     | 2      | 1   | 0     | 0     | 1     | 0     | 0     | 0   | 0   | 0 & 1 | 2     | 1     | 1      | 0   | 2      | 2      | 2      |        |
| Hemiacodon      | 0   | 0   | 2   | 2   | 0 or 1 | 0      | ?   | 1     | 0   | 0     | 0     | 0   | ?   | ?    | 2      | 0     | 0     | 0      | 1   | 0     | 0     | 0 & 1 | 1     | 0     | 0   | 0   | 1     | 2     | 1     | 1      | 0   | 2      | 1 or 2 | 2      |        |
| Loveina         | ?   | ?   | ?   | 2   | ?      | 1      | ?   | 1     | 0   | ?     | ?     | 1   | ?   | ?    | 2      | 0     | ?     | 1      | ?   | ?     | ?     | ?     | ?     | ?     | ?   | 0   | 0     | 2     | 0 & 1 | 1      | 0   | 2      | 2      | 2      |        |
| Macrotarsius    | ?   | ?   | 2   | 2   | ?      | 1      | ?   | 1     | 0   | ?     | 0     | 1   | ?   | ?    | 1      | 0     | 1     | 1      | 0   | 0     | ?     | 1     | 0     | 0     | 0   | 0   | 2     | 2     | ?     | 1      | 0   | 2      | 2      | 2      |        |
| Microchoerus    | 1   | 0   | 2   | 2   | 0      | 1      | 2   | 1     | 0   | 0     | 0     | 0   | 1   | 0    | 2      | 0     | 1     | 0      | 0   | 0     | 0     | 1     | 1     | 0     | 0   | 0   | 2     | 2     | 1     | 2      | 0   | 0      | 0      | 0      |        |
| Nannopithec     | 1   | 1   | 2   | 2   | 0      | 1      | 1   | 1     | 0   | 0     | 0     | 0   | 1   | 0    | 2      | 0     | 1     | 0      | 0   | 0     | 0     | 0     | 1     | 0     | 0   | 0   | 0 & 1 | 1     | 1 & 2 | 1      | 0   | 2      | 1 & 2  | 1      |        |
| Necrolemur      | ?   | 0   | 2   | 2   | 0      | 1      | 2   | 1 & 2 | 1   | 0     | 0     | 0   | 1   | 0    | 2      | 0     | 1     | 0      | 0   | 0     | 0     | 1     | 0     | 0     | 0   | 0   | 2     | 1 & 2 | 1     | 2      | 0   | 1      | 1      | 1      |        |
| Omomys          | ?   | 0   | 2   | 2   | 0      | 1      | 2   | 1     | 0   | 0     | 0     | 0   | 1   | 0    | 2      | 0     | 1     | 0      | 1   | 0     | 0     | 0     | 0 & 1 | 0     | 0   | 0   | 1     | 2     | 0     | 1      | 0   | 2      | 2      | 2      |        |
| Shoshonius      | ?   | 0   | 2   | 2   | 0      | 1      | 1   | 1     | 0   | 0     | 0 & 1 | 1   | 1   | ?    | 2      | 0     | 0     | 1      | 1   | 0     | 1     | 1     | 0     | 0     | 0   | 0   | 0 & 1 | ?     | 1     | 1      | 0   | 2      | 2      | 2      |        |
| Steinius        | ?   | ?   | 2   | 2   | ?      | 1      | ?   | 1     | 0   | 0     | 0     | 0   | ?   | 0    | 2      | 0     | 1     | 0      | 1   | 0     | 0     | 1     | 0     | 0     | 0   | 0   | 1     | 1     | 1 & 2 | 1      | 0   | 2      | 2      | 2      |        |
| Strigorhysis    | ?   | 0   | 2   | 2   | 0      | 2      | ?   | 1     | 0   | 0     | 0     | 0   | 1   | 0    | 2      | 0     | 0     | 0      | 1   | 0     | 0     | 0     | 0     | 0     | 0   | 0   | 0     | 2     | 2     | 1      | 0   | 2      | 2      | 2      |        |
| Teilhardina_a   | ?   | ?   | 2   | 2   | ?      | 0 & 1  | ?   | 1     | 0   | 0     | 0     | 0   | ?   | 0    | 2      | 0     | 1     | 1      | 1   | 0     | ?     | 1     | 0     | 0     | 0   | 0   | 2     | 1 & 2 | 1     | 0      | 2   | 2      | 2      | 2      |        |
| Teilhardina_b   | ?   | ?   | 2   | 2   | ?      | 0 or 1 | 2   | 1     | 0   | 0     | 0     | 0   | ?   | ?    | 2      | 0     | 1     | 1      | 1   | 0     | 0     | 0     | 0     | 0     | 0   | 0   | 0     | 2     | 0     | 1      | 0   | 2      | 2      | 2      |        |
| Tetonius        | 1   | 0   | 2   | 2   | 0      | 2      | 3   | 1     | 0   | 0     | 0     | 0   | 1   | 0    | 2      | 0 & 1 | 0     | 1      | 1   | 0 & 1 | 0 & 1 | 0 & 1 | 0     | 0     | 0   | 0   | 0     | 1     | 1     | 1      | 0   | 2      | 2      | 2      |        |
| Uintanius       | ?   | ?   | 2   | 2   | ?      | 2      | ?   | 0     | 0   | 1     | 0     | 0   | ?   | ?    | 2      | 0     | 0     | 0      | 1   | 0     | 0     | 0     | 0     | 0     | 0   | 0   | 1     | 2     | 0     | 1      | 0   | 2      | 2      | 2      |        |
| Washakius       | 2   | 0   | 2   | 2   | 0      | 1      | 1   | 1     | 0   | 0     | 0 & 1 | 0   | 0   | 0    | 2      | 0     | 1     | 1      | 0   | 0     | 0     | 1     | 1     | 1     | 0   | 0   | 0 & 1 | 2     | 1     | 2      | 0   | 1      | 1      | 1      |        |
| Atrotarsius     | ?   | ?   | ?   | ?   | ?      | ?      | ?   | ?     | ?   | ?     | ?     | ?   | ?   | ?    | ?      | ?     | ?     | ?      | ?   | ?     | ?     | ?     | ?     | ?     | ?   | ?   | ?     | ?     | ?     | ?      | ?   | ?      | ?      | ?      | ?      |
| Eosimias        | ?   | ?   | 2   | 2   | ?      | ?      | ?   | ?     | 0   | 0     | 0     | 0   | ?   | ?    | ?      | ?     | 1     | 1      | 1   | 1     | 0     | 1     | 0     | 0     | 0   | ?   | 0     | ?     | 0     | 0      | 0   | 2      | 2      | 2      |        |
| Phenacopithecus | ?   | ?   | ?   | 2   | ?      | 0      | ?   | 0     | 0   | ?     | 0     | 0   | ?   | ?    | 2      | 0     | 1     | 1      | 1   | 1     | ?     | 1     | 0     | ?     | 0   | ?   | 0     | 2     | 0     | 1      | 0   | 2      | 2      | 2      |        |
| Bahinia         | 1   | 0   | 2   | 2   | 0      | 1      | 3   | 0     | 1   | 0 & 1 | 0     | 0   | 1   | 0    | 2      | 0     | 1     | ?      | 0   | ?     | 0     | 1     | 0     | 0     | 0   | ?   | 0     | 2     | 0     | 0      | 0   | 2      | 2      | 2      |        |
| Tarsius         | 1   | 0   | 2   | 2   | 0      | 0      | 3   | 1     | 0   | 0     | 1     | 0   | 0   | 1    | 0      | 2     | 0 & 1 | 1      | 0   | 1     | 0     | 0     | 1     | 0     | 0   | 0   | 1     | 2     | 0     | 1      | 0   | 1 or 2 | 1 or 2 | 1 or 2 |        |
| Xanthorhysis    | ?   | ?   | ?   | ?   | ?      | ?      | ?   | ?     | ?   | ?     | ?     | ?   | ?   | ?    | ?      | ?     | ?     | ?      | ?   | ?     | ?     | ?     | ?     | ?     | ?   | ?   | ?     | ?     | ?     | ?      | ?   | ?      | ?      | ?      | ?      |
| Aegyptopithecus | 1   | 0   | 2   | 2   | 0      | 1      | ?   | 1     | 0   | 0     | 0     | 1   | 1   | 0    | 2      | 1     | 1     | 0      | 0   | 1     | 0     | 0     | 2     | 2     | 0   | 0   | 1     | 2     | 0     | 1      | 1   | 0      | 0      | 0      |        |
| Moeripithecus   | ?   | 0   | 1   | 2   | 0      | 1      | ?   | 1     | 0   | 0     | 0     | 1   | ?   | 0    | 2      | 0     | 1     | 0      | 0   | 1     | 0     | 0     | 0     | 0     | 0   | ?   | 1     | 2     | 0     | 0      | 0   | 0      | 0      | 1      |        |
| Apidium         | ?   | 1   | 2   | 2   | 1      | 1      | 1   | 1     | 0   | 0     | 0     | 0   | 0   | 0    | 0      | 0     | 0     | 0 or 1 | 0   | 0     | 0     | 0     | 0     | 0     | 0   | 0   | 1     | 2     | 0     | 1      | 2   | 0      | 0      | 0      |        |
| Arsinoea        | ?   | ?   | ?   | ?   | ?      | ?      | ?   | ?     | ?   | ?     | ?     | ?   | ?   | ?    | ?      | ?     | ?     | ?      | ?   | ?     | ?     | ?     | ?     | ?     | ?   | ?   | ?     | ?     | ?     | ?      | ?   | ?      | ?      | ?      | ?      |
| Catopithecus    | 0   | 0   | 2   | 2   | 0      | 1      | ?   | 1     | 0   | 0     | 0     | 0   | 1   | 0    | 2      | 0     | 1     | 0      | 1   | 1     | 0     | 1     | 0     | 0     | 0   | 0   | 1     | 2     | 0     | 0      | 0   | 1      | 1      | 1      |        |
| Oligopithecus   | ?   | 0   | 2   | 2   | 0      | 1      | ?   | 1     | 0   | 0     | 0     | 1   | 1   | 0    | 2      | 0     | 0     | 0      | 1   | 1     | 0     | 0     | 0     | 0     | 0   | 0   | 0     | 1     | 2     | 0      | 0   | 0      | 1      | 1      |        |
| Parapithecus    | ?   | ?   | ?   | ?   | ?      | ?      | ?   | ?     | ?   | ?     | ?     | ?   | ?   | ?    | ?      | ?     | ?     | ?      | ?   | ?     | ?     | ?     | ?     | ?     | ?   | ?   | ?     | ?     | ?     | ?      | ?   | ?      | ?      | ?      | ?      |
| Proteopithecus  | 1   | 0   | 2   | 2   | 0      | 2      | 0   | 1</   |     |       |       |     |     |      |        |       |       |        |     |       |       |       |       |       |     |     |       |       |       |        |     |        |        |        |        |

| TAXA            | 165  | 166 | 167 | 168 | 169  | 170 | 171  | 172 | 173  | 174  | 175 | 176  | 177 | 178 | 179 | 180 | 181 | 182  | 183 | 184 | 185   | 186   | 187   | 188   | 189   | 190   | 191   | 192   | 193   | 194   | 195   | 196   | 197   |   |
|-----------------|------|-----|-----|-----|------|-----|------|-----|------|------|-----|------|-----|-----|-----|-----|-----|------|-----|-----|-------|-------|-------|-------|-------|-------|-------|-------|-------|-------|-------|-------|-------|---|
| TAXA            | M12' | M13 | M14 | M15 | M16  | M17 | M17' | M20 | M22  | M24  | M27 | M28  | M30 | M31 | M33 | M34 | M36 | M37  | M44 | M46 | ML147 | ML148 | ML149 | ML150 | ML151 | ML152 | ML153 | ML154 | ML155 | ML156 | ML157 | ML158 | ML159 |   |
| Scandentia      | 0    | 0   | 0   | 0   | 0    | 0   | ?    | 0   | 2    | 2    | ?   | ?    | 0   | 0   | 0   | 1   | 0   | 1    | 1   | 1   | 1     | 1     | 1     | 1     | 1     | 2     | 0     | 0     | 0     | 2     | 2     | 0     |       |   |
| Paromomys       | ?    | 0   | 0   | 0   | 1    | 0   | ?    | 0   | 0    | 2    | 0   | 0    | 1   | 0   | 1   | 1   | 0   | 1    | 0   | 2   | 1     | 1     | 1     | 1     | 1     | 2     | 1     | 1     | 1     | 0     | 2     | 2     | 1     |   |
| Plesiadapis     | ?    | 0   | 0   | 0   | 1    | 2   | 1    | 0   | 0    | 2    | 0   | 0    | 1   | 0   | 0   | 1   | 0   | 1    | 1   | 2   | 0     | 1     | 1     | ?     | 2     | 0     | 1     | 1     | 0     | 0     | 2     | 2     | 1     |   |
| Plesiolestes    | ?    | 0   | 0   | 0   | 1    | 0   | ?    | 0   | 0    | 2    | 0   | 1    | 1   | 0   | 0   | 1   | 0   | 1    | 2   | 1   | 0     | 1     | 1     | ?     | 1     | 1     | 0     | 0     | 0     | 1     | 2     | 2     | 1     |   |
| Purgatorius     | 1    | 0   | 0   | 0   | 2    | 0   | ?    | 0   | 2    | 1or2 | 1   | 1    | ?   | 0   | ?   | ?   | ?   | 1    | ?   | ?   | 1     | 1     | 1     | 1     | 1     | 2     | 0     | 0     | 0     | 1     | 1     | 1     | 0     |   |
| Adapis          | 1    | 0   | 0   | 0   | 0    | 0   | ?    | 0   | 2    | 2    | 0   | 0    | 1   | 0   | 0   | 2   | 0   | 1    | 1   | 2   | 1     | 1     | 0     | 0     | 2     | 0     | 2     | 2     | 0     | 1     | 1     | 1     | 0     |   |
| Notharctus      | 1    | 0   | 0   | 0   | 2    | 1   | 0    | 0   | 2    | 1&2  | 0   | 0    | 0&1 | 1   | 1   | 1   | 0   | 1    | 1   | 1   | 1     | 2     | 2     | 1     | 1     | 2     | 0     | 2     | 2     | 0     | 0     | 1     | 1     | 0 |
| Cantius         | ?    | 0   | 0   | 0   | 2    | 0   | ?    | 0   | 1&2  | 2    | 1   | 0    | 1   | 1   | 0   | 1   | 0   | 1    | 0   | 1   | 1     | 0or1  | 0     | 0     | 2     | 0     | 1     | 1     | 0     | 0     | 1     | 0     | 1     | 0 |
| Donrussellia    | ?    | 0   | 0   | 0   | 0&1  | 0   | ?    | 0   | 2    | 1&2  | 0   | 0    | 0   | 0   | 0   | 2   | ?   | 1    | 1   | 2   | 0     | 1     | 0     | ?     | 2     | 0     | 1     | 1     | 1     | 1     | 1     | 0     | 0     |   |
| Leptadapis      | 1    | 0   | 0   | 0   | 0    | 0   | ?    | 0   | 1    | 2    | 0   | 0    | 1   | 0   | 0   | 2   | 1   | 1    | 1   | 2   | 1     | 1     | 0     | 0     | 2     | 0     | 1     | 1     | 2     | 0     | 1     | 1     | 1     | 0 |
| Mahgarita       | 1    | 2   | 0   | 0   | 1    | 0   | ?    | 0   | 2    | 2    | 1   | 0    | 0   | 0   | 0   | 2   | 1   | 1    | 1   | 1   | 0     | 0     | ?     | ?     | 2     | 0     | 2     | 1     | 0     | 1     | 2     | 2     | 0     |   |
| Aframionius     | 1    | 0   | 1   | 0   | 1    | 0   | ?    | 0   | 2    | 2    | 0   | 0    | 1   | 0   | 0   | 2   | 1   | 1    | 1   | 2   | 1     | 1     | 0     | 1     | 2     | 0     | 2     | 1     | 0     | 1     | 1     | 1     | 0     |   |
| Pronycticebus   | 0    | 0   | 0   | 0   | 1    | 0   | ?    | 0   | 2    | 2    | 1   | 0    | ?   | 1   | 1   | 2   | 1   | 1    | 1   | 2   | 1     | 1     | 1     | 1     | 2     | 0     | 1     | 0     | 0     | 1     | 2     | 2     | 0     |   |
| Protoadapis     | 0    | 0   | 0   | 0   | 0    | 0   | ?    | 0   | 2    | 1&2  | 0   | 0    | 0   | 0   | 0   | 2   | 0   | 1    | 0   | 1   | 1     | 1     | 0     | 0     | 2     | 0     | 1     | 1     | 0     | 0     | 2     | 2     | 0     |   |
| Percinodan      | 0    | 1   | 0   | 0   | 1    | 0   | ?    | 2   | 1or2 | 1    | 1   | 0    | 1   | 0   | 0   | 2   | 0   | 1    | 1   | 2   | 0     | 1     | 0     | ?     | 2     | 0     | 1     | 1     | 0     | 0     | 1     | 1     | 0&1   |   |
| Guangxilemur    | 1    | 0   | ?   | ?   | 0    | 0   | 0    | 1   | 2    | 2    | 0   | 1    | 1   | 0   | 0   | ?   | ?   | 1    | 1   | ?   | 1     | 2     | 0     | 0     | 1     | 1     | 2     | 2     | 0     | 0     | 2     | 2     | 0     |   |
| Hoanghoni       | 1    | 0   | ?   | 0   | 1    | 1   | 0    | 2   | 2    | 2    | 0   | 0    | ?   | 0   | ?   | ?   | 1   | 0    | ?   | 0   | ?     | ?     | ?     | 1     | 2     | 1     | 1     | 0     | 0     | ?     | 2     | ?     |       |   |
| Sivaladapis     | ?    | 0   | 0   | 0   | 1    | 2   | 0    | 0   | 2    | 2    | 0   | 1    | 1   | 0   | 1   | 0   | 1   | 1    | 2   | 0   | 2     | 0     | 2     | 0     | ?     | 1     | 1     | 2     | 2     | 0     | 0     | 2     | 2     | 0 |
| Galagoides      | 0    | 1   | 0   | 0   | 0    | 0   | ?    | 0   | 0    | 0    | 0   | 0    | 0   | 1   | 0   | 1   | 0   | 1    | 2   | 0   | 1     | 2     | 0     | 1     | 2     | 2     | 1     | 1     | 0     | 0     | 2     | 1     | 0     |   |
| Microcebus      | 0    | 0   | 0   | ?   | 0    | 0   | ?    | 0   | 2    | 1    | 0   | 0    | 0   | 0   | 0   | 2   | 1   | 0    | 2   | 1   | 0     | 0     | 0     | 0or1  | 2     | 1     | 0     | 0     | 1     | 0     | 2     | 2     | 0     |   |
| Nycticebus      | 0    | 1   | 0   | 0   | 0    | 0   | ?    | 0   | 1    | 2    | 0   | 0    | 0   | 1   | 1   | 1   | 0   | 1    | 2   | 0   | 1     | 1     | 1     | 1     | 2     | 2     | 1     | 1     | 0     | 0     | 2     | 2     | 0     |   |
| Lemur           | 0    | 0   | 0   | ?   | 0    | 0   | ?    | 2   | 2    | 0    | 0   | 0    | 0   | 1   | 0   | 1   | 0   | 0    | 1   | 1   | 0     | 1     | 0     | 0     | 1     | 1     | 1     | 1     | 0     | 1     | 0     | 1     | 1     |   |
| Absarokius      | ?    | 0   | 0   | 0   | 1    | 0   | ?    | 0   | 1    | 2    | 1   | 0    | 0&1 | 1&2 | 1   | 1   | 0   | 0&1  | 1   | 1   | 0     | 0     | 1     | 0     | ?     | 2     | 1     | 1     | 1     | 0     | 1     | 1     | 2     | 1 |
| Anaptomorphus   | ?    | 0   | 0   | 0   | 1    | 0   | ?    | 0   | 0    | 1    | 0   | 0    | 0&1 | 2   | 1   | 1   | 0   | 1    | 1   | 1   | 0     | 1     | 0     | ?     | 2     | 0     | 1     | 0     | 1     | 0     | 1     | 1     | 1     | 1 |
| Anemorhysis     | ?    | 0   | 0   | 0   | 1    | 0   | ?    | 0   | 0    | 2    | 1   | 1    | 1   | 1   | 0   | 1   | 0   | 1    | 1   | 1   | 1     | 1     | 0     | 1     | 2     | 0     | 0     | 0     | 1     | 1     | 1     | 1     | 1     |   |
| Arapaphovius    | ?    | 0   | 0   | 0   | 2    | 0   | ?    | 0   | 1    | 2    | 1   | 1    | 1   | 1   | 0   | 1&2 | 0   | 1    | 1   | 2   | 1     | 1     | 0     | 1     | 1     | 0     | 1     | 1     | 1     | 1     | 2     | 2     | 1     |   |
| Dysecollemur    | 0    | 0   | 0   | 0   | 2    | 0   | ?    | 0   | 2    | 2    | 0   | 0    | 1   | 0   | ?   | 2   | 0   | 1    | 1   | 1   | 0     | 0     | ?     | ?     | 2     | 0     | 1     | 1     | 0     | 1     | 1     | 2     | 1     |   |
| Hemiacodon      | 0    | 0   | 0   | 0   | 2    | 0   | ?    | 0&1 | 1    | 2    | 1   | 1    | 2   | 1   | 0&1 | 2   | 0   | 1&2  | 0   | 1&2 | 1     | 1     | 0     | 1     | 2     | 1     | 1     | 1     | 0     | 1     | 1     | 1     | 1     |   |
| Loveina         | ?    | 0   | 0   | 0   | 1    | 1   | 1    | 0   | 0    | 2    | 0   | 0    | 1   | 1   | 1   | 0   | 1   | 0    | 2   | 0   | 1     | 1     | ?     | 2     | 1     | 1     | 1     | 0     | 1     | 0     | 1     | 0     | 1     | 1 |
| Macrotarsius    | ?    | 0   | 0   | 0   | 2    | 2   | 1    | ?   | 1    | 2    | 0   | 0    | 1   | 1   | 1   | 1   | 0   | 1    | 0   | 2   | 2     | 2     | 1     | 1     | 2     | 0     | 2     | 2     | 0     | 0     | 2     | 2     | 1     |   |
| Microchoerus    | 1    | 0   | 0   | 1   | 3    | 0&1 | 1    | 0   | 1or2 | 2    | 0   | 0    | 1   | 1   | 0   | 1   | 0   | 1    | 1   | 1   | 1     | 1     | 0     | 0     | 2     | 0     | 1     | 1     | 1     | 0     | 0     | 1     | 1     | 1 |
| Nannopithec     | 1    | 0   | 0   | 0   | 1    | 1   | 1    | 0   | 1&2  | 0&1  | 1   | 1    | 0&1 | 0   | 1   | 1   | 0   | 1    | 0   | 1&2 | 1     | 1     | 0     | 0     | 2     | 0     | 1     | 0     | 0     | 1     | 1     | 2     | 1     | 1 |
| Necrolemur      | 1    | 0   | 1&2 | 0&1 | 2    | 0   | ?    | 0   | 0    | 2    | 0   | 0    | 0   | 1   | 1   | 0   | 1   | 1    | 1   | 1   | 1     | 0     | 0     | 2     | 0     | 0     | 0     | 1     | 0     | 1     | 1     | 1     | 1     |   |
| Omomys          | 1    | 0   | 0   | 0   | 1    | 0   | ?    | 0&1 | 2    | 2    | 1   | 0&1  | 1   | 0   | 0   | 2   | 0   | 1    | 0   | 2   | 1     | 1     | 0     | 1     | 2     | 1     | 1     | 0     | 0     | 0     | 1     | 1     | 1     |   |
| Shoshonius      | ?    | 0   | 0   | 0   | 2    | 1   | 1    | 1   | 1    | 2    | 0   | 0    | 1   | 0   | 1   | 2   | 0   | 1    | 0   | 2   | 1     | 1     | 1     | 1     | 2     | 0     | 1     | 1     | 0     | 0     | 2     | 2     | 1     |   |
| Steinius        | ?    | 0   | 0   | 0   | 1    | 0   | ?    | 0   | 1    | 2    | 1   | 0    | 0&1 | 0   | 0   | 1   | 0   | 1    | 0   | 1   | 1     | 1     | 1     | 1     | 2     | 1     | 1     | 1     | 0     | 0     | 1     | 1     | 1     |   |
| Strigorhysis    | ?    | 0   | 0   | 0   | 1    | 0   | ?    | 0   | 0    | 1    | 0   | 0    | 0&1 | 2   | 1   | 1   | 0   | 1    | 1&2 | 1   | 1     | 1     | 0     | 0     | 2     | 0     | 1     | 0     | 1     | 0     | 2     | 2     | 1     |   |
| Teilhardina_a   | ?    | 0   | 0   | 0   | 1    | 0   | ?    | 0   | 2    | 2    | 1   | 1    | 0&1 | 1   | 1   | 1   | 0   | 0&1  | 0   | 1   | 1     | 1     | 0     | 1     | 2     | 1     | 1     | 0     | 0     | 0     | 2     | 2     | 1     |   |
| Teilhardina_b   | ?    | 0   | 0   | 0   | 1    | 0   | ?    | 0   | 1    | 1    | 1   | 1    | 0&1 | 1   | 0   | 1   | 0   | 0&1  | 1   | 0   | 0or1  | 1     | 0     | 0     | 1     | 1     | 1     | 0     | 0     | 0     | 1     | 1     | 1     | 1 |
| Tetonius        | ?    | 0   | 0   | 0   | 1    | 0   | ?    | 0   | 1    | 2    | 1   | 1    | 0&1 | 1   | 1   | 1   | 0   | 0&1  | 0   | 1   | 1     | 1     | 0     | 1     | 2     | 0     | 1     | 0     | 1     | 0     | 1     | 1     | 1     | 1 |
| Uintanius       | ?    | 0   | 0   | 0   | 2    | 0   | ?    | 0   | 0&1  | 0&1  | 0   | 0    | 1   | 0   | ?   | 1   | 0   | 1    | 0&1 | 1&2 | 1     | 2     | 0     | 0     | 2     | 1     | 1     | 0     | 1     | 1     | 0     | 1     | 1     | 1 |
| Washakius       | 0    | 0   | 0   | 0   | 2    | 1   | 1    | 1   | 1    | 2    | 0   | 0or1 | 2   | 0   | 0   | 1   | 0   | 1&2  | 0   | 2   | 1     | 1     | 1     | 1     | 2     | 0     | 1     | 0     | 1     | 1     | 1     | 0     | 0     | 1 |
| Atrotarsius     | ?    | ?   | ?   | ?   | ?    | ?   | ?    | ?   | ?    | ?    | ?   | ?    | ?   | ?   | ?   | ?   | ?   | ?    | ?   | ?   | ?     | ?     | ?     | ?     | ?     | ?     | ?     | ?     | ?     | ?     | ?     | ?     | ?     | ? |
| Eosimias        | ?    | 0   | 0   | 0   | 0    | 0   | ?    | 0   | 2    | 2    | 0   | 0    | 1   | 0   | 0   | 1   | 0   | 1    | ?   | 1   | 1     | 1     | 1     | 1     | 2     | 1     | 1     | 0     | 0     | 1     | 2     | 2     | 0     |   |
| Phenacopithecus | 0    | 0   | 0   | 0   | 0    | 0   | ?    | 0   | 2    | 2    | 0   | 0    | 1   | 0   | 0   | 1   | 0   | 1    | 1   | ?   | ?     | 2     | 1     | 1     | 1     | 2     | 2     | 1     | 1     | 0     | 0     | 2     | 2     | 0 |
| Bahinia         | ?    | 0   | ?   | ?   | 0    | 0   | ?    | 0   | 2    | 2    | 0   | 0    | ?   | 0   | 0   | ?   | ?   | 0    | 1   | ?   | 1     | 1     | 1     | 1     | 2     | 1     | 1     | 1     | 0     | 0     | 2     | 2     | 0     |   |
| Tarsius         | 1    | 0   | 0   | 0   | 0or1 | 0   | ?    | 0   | 2    | 1&2  | 0   | 0    | 1   | 0   | 0   | 2   | 0   | 1    | 0&1 | 2   | 0     | 1     | 0     | ?     | 2     | 1     | 1     | 1     | 0     | 0     | 2     | 2     | 0     | 0 |
| Xanthorhysis    | ?    | ?   | ?   | ?   | ?    | ?   | ?    | ?   | ?    | ?    | ?   | ?    | ?   | ?   | ?   | ?   | ?   | ?    | ?   | ?   | ?     | ?     | ?     | ?     | ?     | ?     | ?     | ?     | ?     | ?     | ?     | ?     | ?     | ? |
| Aegyptopithecus | 1    | 0   | 0   | 0   | 1    | 0   | ?    | 0   | 2    | 1    | 0   | 0    | 0   | 1   | 2   | 0   | 0   | 0or1 | 1   | 2   | 0     | 1     | 0     | ?     | 2     | 0     | 1     | 0     | 0     | 0     | 1     | 0     | 0     |   |
| Moeripithecus   | 1    | 1   | ?   | ?   | 0    | 0   | ?    | 1   | 2    | 1    | 0   | 0    | ?   | 0&1 | 2   | ?   | ?   | ?    | ?   | ?   | ?     | ?     | ?     | ?     | 2     | 0     | 1     | 1     | 0     | 0     | 2     | 1     | 0     |   |
| Apidium         | 0    | 1   | 0   | 1   | 3    | 0   | ?    | 2   | 2    | 1    | 0   | 0    | 2   | 1   | 0   | 0   | 2   | 2    | 1   | 1   | 1     | 1     | 0     | 0     | 2     | 0     | 1     | 1     | 0     | ?     | 0     | 0     | ?     |   |
| Arsinoea        | ?    | ?   | ?   | ?   | ?    | ?   | ?    | ?   | ?    | ?    | ?   | ?    | ?   | ?   | ?   | ?   | ?   | ?    | ?   | ?   | ?     | ?     | ?     | ?     | ?     | ?     | ?     | ?     | ?     | ?     | ?     | ?     | ?     | ? |
| Catopithecus    | 1    | 0   | 0   | ?   | 0    | 1   | 1    | 0   | 2    | 2    | 0   | 0    | 0   | 1   | 0   | 1   | 0   | 0    | 0&1 | 1   | 1     | 1     | 0     | 1     | 2     | 1     | 1     | 0     | 0     | 0     | 2     | 2     | 0     |   |
| Oligopithecus   | 1    | 0   | 0   | ?   | 0    | 0   | ?    | 0   | 2    | 0    | 0   | 0    | 0   | 1   | 0   | 1   | 0   | 0    | 1   | 1   | 0&1   | 1     | 0     | 0     | 2     | 2     | 1     | 1     | 0     | 0     | 2     | 2     | 0     |   |
| Parapithecus    | ?    | ?   | ?   | ?   | ?    | ?   | ?    | ?   | ?    | ?    | ?   | ?    | ?   | ?   | ?   | ?   | ?   | ?    | ?   | ?   | ?     | ?     | ?     | ?     | ?     | ?     | ?     | ?     | ?     | ?     | ?     | ?     | ?     | ? |
| Proteopithecus  | 1    | 0   | 0   | ?   | 0or1 | 0   | ?    | 0   | 2    | 2    | 0   | 0    | 0   | 1   | 0   | 0   | 1   | 0    | 0   | 1   | 0     | 0     | 1     | 0     |       |       |       |       |       |       |       |       |       |   |

| TAXA            | 208 | 209 | 210 | 211 | 212 | 213 | 214 | 215 | 216 | 217  | 218   | 219  | 220  | 221  | 222  | 223  | 224  | 225  | 226  | 227  | 228  | 229  | 230  | 231   | 232  | 233  | 234  | 235  | 236  | 237  | 238   | 239  | 240  | 241  | 242  |   |   |
|-----------------|-----|-----|-----|-----|-----|-----|-----|-----|-----|------|-------|------|------|------|------|------|------|------|------|------|------|------|------|-------|------|------|------|------|------|------|-------|------|------|------|------|---|---|
| TAXA            | CR1 | CR2 | CR3 | CR4 | CR5 | CR6 | CR7 | CR8 | CR9 | CR10 | CR11  | CR12 | CR13 | CR14 | CR15 | CR16 | CR17 | CR18 | CR19 | CR20 | CR21 | CR22 | CR23 | CR24  | CR25 | CR26 | CR27 | CR28 | CR29 | CR30 | CR31  | CR32 | CR33 | CR34 | CR35 |   |   |
| Scandentia      | 0   | ?   | 0   | 0   | 0   | 0   | 0   | 0   | 1   | 0    | 0     | 1    | 1    | 0    | 0    | 0    | 0    | 0    | 0    | 0    | 1    | 0    | 0    | 0 & 1 | ?    | 0    | 0    | 0    | 0    | 0    | 1     | 0    | 0    | 0    | 0    |   |   |
| Paromomys       | ?   | ?   | ?   | ?   | ?   | ?   | ?   | ?   | ?   | ?    | ?     | ?    | ?    | ?    | ?    | ?    | ?    | ?    | ?    | ?    | ?    | ?    | ?    | ?     | ?    | ?    | ?    | ?    | ?    | ?    | ?     | ?    | ?    | ?    | ?    | ? |   |
| Plesiadapis     | 0   | ?   | ?   | 0   | 0   | 2   | 0   | 0   | 0   | 0    | 4     | 0    | 1    | 0    | 0    | 2    | 0    | ?    | ?    | 0    | 0    | 0    | 0    | 0     | ?    | 0    | 1    | 0    | 0    | 0    | 0     | 1    | 0    | 0    | 0    |   |   |
| Plesiolestes    | ?   | ?   | ?   | ?   | ?   | ?   | ?   | ?   | ?   | ?    | ?     | ?    | ?    | ?    | ?    | ?    | ?    | ?    | ?    | ?    | ?    | ?    | ?    | ?     | ?    | ?    | ?    | ?    | ?    | ?    | ?     | ?    | ?    | ?    | ?    | ? |   |
| Purgatorius     | ?   | ?   | ?   | ?   | ?   | ?   | ?   | ?   | ?   | ?    | ?     | ?    | ?    | ?    | ?    | ?    | ?    | ?    | ?    | ?    | ?    | ?    | ?    | ?     | ?    | ?    | ?    | ?    | ?    | ?    | ?     | ?    | ?    | ?    | ?    | ? |   |
| Adapis          | 0   | ?   | 1   | 0   | 0   | 2   | 0   | 0   | 0   | 0    | 1 & 3 | 0    | 1    | 0    | 0    | 1    | 0    | 2    | 0    | 0    | 0    | 0    | 1    | 0     | 1    | ?    | 0    | 0    | 1    | ?    | 0 & 1 | 1    | 1    | 0    | 1    |   |   |
| Notharctus      | 0   | ?   | ?   | 0   | 0   | 2   | 0   | 0   | 0   | 0    | 3     | 0    | 1    | ?    | ?    | ?    | ?    | ?    | ?    | ?    | ?    | ?    | ?    | ?     | ?    | ?    | ?    | ?    | ?    | ?    | ?     | ?    | ?    | ?    | ?    |   |   |
| Cantius         | ?   | ?   | ?   | ?   | ?   | ?   | ?   | ?   | ?   | ?    | ?     | ?    | ?    | ?    | ?    | ?    | ?    | ?    | ?    | ?    | ?    | ?    | ?    | ?     | ?    | ?    | ?    | ?    | ?    | ?    | ?     | ?    | ?    | ?    | ?    | ? |   |
| Donrussellia    | ?   | ?   | ?   | ?   | ?   | ?   | ?   | ?   | ?   | ?    | ?     | ?    | ?    | ?    | ?    | ?    | ?    | ?    | ?    | ?    | ?    | ?    | ?    | ?     | ?    | ?    | ?    | ?    | ?    | ?    | ?     | ?    | ?    | ?    | ?    | ? |   |
| Leptadapis      | 0   | ?   | 1   | 0   | 0   | 2   | 0   | 0   | 0   | 0    | 3     | 0    | ?    | 0    | 0    | 1    | 0    | ?    | ?    | 0    | 0    | 1    | 0    | 1     | ?    | ?    | ?    | ?    | ?    | 0    | ?     | 1    | ?    | ?    | 1    |   |   |
| Mahgarita       | 0   | ?   | 1   | 0   | 0   | 2   | 0   | 0   | 0   | 0    | 1 & 2 | 1    | 1    | 0    | 0    | 1    | 0    | 1    | 1    | 0    | 0    | 1    | 0    | 1     | ?    | 1    | 0    | ?    | ?    | ?    | ?     | 1    | 0    | 1    | 0    | 1 |   |
| Aframomius      | ?   | ?   | ?   | ?   | ?   | ?   | ?   | ?   | ?   | ?    | ?     | ?    | ?    | ?    | ?    | ?    | ?    | ?    | ?    | ?    | ?    | ?    | ?    | ?     | ?    | ?    | ?    | ?    | ?    | ?    | ?     | ?    | ?    | ?    | ?    | ? |   |
| Prorycticebus   | 0   | ?   | 0   | 0   | 0   | 2   | 0   | 0   | 0   | 0    | 3     | 1    | 1    | 0    | 0    | 1    | 1or2 | 1    | 0    | 1    | 0    | 1    | 1    | 1     | ?    | 0    | 0    | 1    | 1    | 0    | 0     | 1    | ?    | ?    | 1    |   |   |
| Protodapids     | ?   | ?   | ?   | ?   | ?   | ?   | ?   | ?   | ?   | ?    | ?     | ?    | ?    | ?    | ?    | ?    | ?    | ?    | ?    | ?    | ?    | ?    | ?    | ?     | ?    | ?    | ?    | ?    | ?    | ?    | ?     | ?    | ?    | ?    | ?    | ? |   |
| Guangxilemur    | ?   | ?   | ?   | ?   | ?   | ?   | ?   | ?   | ?   | ?    | ?     | ?    | ?    | ?    | ?    | ?    | ?    | ?    | ?    | ?    | ?    | ?    | ?    | ?     | ?    | ?    | ?    | ?    | ?    | ?    | ?     | ?    | ?    | ?    | ?    | ? |   |
| Hoanghoni       | ?   | ?   | ?   | ?   | ?   | ?   | ?   | ?   | ?   | ?    | ?     | ?    | ?    | ?    | ?    | ?    | ?    | ?    | ?    | ?    | ?    | ?    | ?    | ?     | ?    | ?    | ?    | ?    | ?    | ?    | ?     | ?    | ?    | ?    | ?    | ? |   |
| Sivaladapis     | ?   | ?   | ?   | ?   | ?   | ?   | ?   | ?   | ?   | ?    | ?     | ?    | ?    | ?    | ?    | ?    | ?    | ?    | ?    | ?    | ?    | ?    | ?    | ?     | ?    | ?    | ?    | ?    | ?    | ?    | ?     | ?    | ?    | ?    | ?    | ? |   |
| Galagoides      | 2   | ?   | 1   | 0   | 0   | 0   | 0   | 0   | 0   | ?    | 4     | 1    | 0    | 1    | 1    | ?    | 0    | 1    | 0    | 0    | 0    | 1    | 1    | 1     | ?    | ?    | 1    | 2    | 0    | 0    | 0     | 1    | 0    | 1    | 1    |   |   |
| Microcebus      | 0   | ?   | 0   | 0   | 0   | 2   | 0   | 0   | 0   | 0    | 4     | ?    | 0    | 0    | 0    | 1    | 0    | 1    | 0    | 0    | 0    | 1    | 1    | 1     | ?    | ?    | 1    | 2    | 0    | 0    | 0     | 0    | 1    | 0    | 0    | 1 |   |
| Nycticebus      | 2   | ?   | 1   | 0   | 0   | 1   | 0   | ?   | 0   | 4    | ?     | 0    | 1    | 1    | ?    | 0    | 0    | ?    | 0    | 0    | 1    | 1    | 1    | 1     | ?    | ?    | 2    | 2    | 0    | 0    | 0     | 0    | 2    | 1    | 1    | 1 |   |
| Lemur           | 0   | ?   | 0   | 0   | 0   | 2   | 0   | 0   | 0   | 0    | 3     | 0    | 1    | 0    | 0    | 1    | 0    | 1    | 0    | 0    | 0    | 1    | 0    | 1     | ?    | ?    | 0    | 0    | 1    | 0    | 1     | 1    | 0    | 0    | 0    | 1 |   |
| Absarokius      | ?   | ?   | ?   | ?   | ?   | ?   | ?   | ?   | ?   | ?    | ?     | ?    | ?    | ?    | ?    | ?    | ?    | ?    | ?    | ?    | ?    | ?    | ?    | ?     | ?    | ?    | ?    | ?    | ?    | ?    | ?     | ?    | ?    | ?    | ?    | ? |   |
| Anaptomorphus   | ?   | ?   | ?   | ?   | ?   | ?   | ?   | ?   | ?   | ?    | ?     | ?    | ?    | ?    | ?    | ?    | ?    | ?    | ?    | ?    | ?    | ?    | ?    | ?     | ?    | ?    | ?    | ?    | ?    | ?    | ?     | ?    | ?    | ?    | ?    | ? | ? |
| Anemorthisis    | ?   | ?   | ?   | ?   | ?   | ?   | ?   | ?   | ?   | ?    | ?     | ?    | ?    | ?    | ?    | ?    | ?    | ?    | ?    | ?    | ?    | ?    | ?    | ?     | ?    | ?    | ?    | ?    | ?    | ?    | ?     | ?    | ?    | ?    | ?    | ? | ? |
| Arapaphovius    | ?   | ?   | ?   | ?   | ?   | ?   | ?   | ?   | ?   | ?    | ?     | ?    | ?    | ?    | ?    | ?    | ?    | ?    | ?    | ?    | ?    | ?    | ?    | ?     | ?    | ?    | ?    | ?    | ?    | ?    | ?     | ?    | ?    | ?    | ?    | ? | ? |
| Dysolemur       | ?   | ?   | ?   | ?   | ?   | ?   | ?   | ?   | ?   | ?    | ?     | ?    | ?    | ?    | ?    | ?    | ?    | ?    | ?    | ?    | ?    | ?    | ?    | ?     | ?    | ?    | ?    | ?    | ?    | ?    | ?     | ?    | ?    | ?    | ?    | ? | ? |
| Hemiacodon      | ?   | ?   | ?   | ?   | ?   | ?   | ?   | ?   | ?   | ?    | ?     | ?    | ?    | ?    | ?    | ?    | ?    | ?    | ?    | ?    | ?    | ?    | ?    | ?     | ?    | ?    | ?    | ?    | ?    | ?    | ?     | ?    | ?    | ?    | ?    | ? | ? |
| Loveina         | ?   | ?   | ?   | ?   | ?   | ?   | ?   | ?   | ?   | ?    | ?     | ?    | ?    | ?    | ?    | ?    | ?    | ?    | ?    | ?    | ?    | ?    | ?    | ?     | ?    | ?    | ?    | ?    | ?    | ?    | ?     | ?    | ?    | ?    | ?    | ? | ? |
| Macrotarsius    | ?   | ?   | ?   | ?   | ?   | ?   | ?   | ?   | ?   | ?    | ?     | ?    | ?    | ?    | ?    | ?    | ?    | ?    | ?    | ?    | ?    | ?    | ?    | ?     | ?    | ?    | ?    | ?    | ?    | ?    | ?     | ?    | ?    | ?    | ?    | ? | ? |
| Microchoerus    | ?   | ?   | ?   | ?   | ?   | ?   | ?   | ?   | ?   | ?    | ?     | ?    | ?    | ?    | ?    | ?    | ?    | ?    | ?    | ?    | ?    | ?    | ?    | ?     | ?    | ?    | ?    | ?    | ?    | ?    | ?     | ?    | ?    | ?    | ?    | ? | ? |
| Nannopithec     | ?   | ?   | ?   | ?   | ?   | ?   | ?   | ?   | ?   | ?    | ?     | ?    | ?    | ?    | ?    | ?    | ?    | ?    | ?    | ?    | ?    | ?    | ?    | ?     | ?    | ?    | ?    | ?    | ?    | ?    | ?     | ?    | ?    | ?    | ?    | ? | ? |
| Necrolemur      | 0   | ?   | 1   | 0   | 0   | 0   | 0   | 0   | 1   | 0    | 1     | 1    | 1    | 0    | ?    | 2    | 2    | 1    | 1    | 1    | 2    | 0    | 1    | 1     | ?    | 0    | 1    | 1    | 0    | 0    | 1     | 1    | 1    | 1    | 0    | 0 |   |
| Omomys          | 0   | ?   | 1   | 0   | 0   | 0   | 0   | 0   | 0   | 0    | 0     | 1    | 1    | ?    | ?    | ?    | ?    | ?    | ?    | ?    | ?    | ?    | ?    | ?     | ?    | ?    | ?    | ?    | ?    | ?    | ?     | ?    | ?    | ?    | ?    | ? |   |
| Shoshonius      | 0   | ?   | 0   | 0   | 0   | 2   | 0   | 0   | 0   | ?    | 0     | 1    | 1    | 0    | ?    | 2    | 2    | 1    | 1    | 1    | 0    | 0    | 2    | 1     | ?    | 0    | 1    | ?    | ?    | ?    | ?     | 1    | 1    | 0    | 0    | 0 |   |
| Steinius        | ?   | ?   | ?   | ?   | ?   | ?   | ?   | ?   | ?   | ?    | ?     | ?    | ?    | ?    | ?    | ?    | ?    | ?    | ?    | ?    | ?    | ?    | ?    | ?     | ?    | ?    | ?    | ?    | ?    | ?    | ?     | ?    | ?    | ?    | ?    | ? | ? |
| Strigorthisis   | ?   | ?   | ?   | ?   | ?   | ?   | ?   | ?   | ?   | ?    | ?     | ?    | ?    | ?    | ?    | ?    | ?    | ?    | ?    | ?    | ?    | ?    | ?    | ?     | ?    | ?    | ?    | ?    | ?    | ?    | ?     | ?    | ?    | ?    | ?    | ? | ? |
| Teilhardina_A   | ?   | ?   | ?   | ?   | ?   | ?   | ?   | ?   | ?   | ?    | ?     | ?    | ?    | ?    | ?    | ?    | ?    | ?    | ?    | ?    | ?    | ?    | ?    | ?     | ?    | ?    | ?    | ?    | ?    | ?    | ?     | ?    | ?    | ?    | ?    | ? | ? |
| Teilhardina_B   | ?   | ?   | ?   | ?   | ?   | ?   | ?   | ?   | ?   | ?    | ?     | ?    | ?    | ?    | ?    | ?    | ?    | ?    | ?    | ?    | ?    | ?    | ?    | ?     | ?    | ?    | ?    | ?    | ?    | ?    | ?     | ?    | ?    | ?    | ?    | ? | ? |
| Tetonius        | 0   | ?   | ?   | 0   | 0   | ?   | ?   | ?   | ?   | 0    | 0     | 1    | 1    | 0    | ?    | 2    | 2    | 1    | 1    | ?    | ?    | 0    | 1    | 1     | ?    | 0    | 1    | ?    | ?    | ?    | ?     | 0    | 1    | 1    | 1    | 0 | 0 |
| Uintanius       | ?   | ?   | ?   | ?   | ?   | ?   | ?   | ?   | ?   | ?    | ?     | ?    | ?    | ?    | ?    | ?    | ?    | ?    | ?    | ?    | ?    | ?    | ?    | ?     | ?    | ?    | ?    | ?    | ?    | ?    | ?     | ?    | ?    | ?    | ?    | ? | ? |
| Washakius       | ?   | ?   | ?   | ?   | ?   | ?   | ?   | ?   | ?   | ?    | ?     | ?    | ?    | ?    | ?    | ?    | ?    | ?    | ?    | ?    | ?    | ?    | ?    | ?     | ?    | ?    | ?    | ?    | ?    | ?    | ?     | ?    | ?    | ?    | ?    | ? | ? |
| Afrotarsius     | ?   | ?   | ?   | ?   | ?   | ?   | ?   | ?   | ?   | ?    | ?     | ?    | ?    | ?    | ?    | ?    | ?    | ?    | ?    | ?    | ?    | ?    | ?    | ?     | ?    | ?    | ?    | ?    | ?    | ?    | ?     | ?    | ?    | ?    | ?    | ? | ? |
| Eosimias        | ?   | ?   | ?   | ?   | ?   | ?   | ?   | 1   | 1   | 0    | 0     | ?    | ?    | ?    | ?    | ?    | ?    | ?    | ?    | ?    | ?    | ?    | ?    | ?     | ?    | ?    | ?    | ?    | ?    | ?    | ?     | ?    | ?    | ?    | ?    | ? | ? |
| Phenacopithecus | ?   | ?   | ?   | ?   | ?   | ?   | ?   | ?   | ?   | ?    | ?     | ?    | ?    | ?    | ?    | ?    | ?    | ?    | ?    | ?    | ?    | ?    | ?    | ?     | ?    | ?    | ?    | ?    | ?    | ?    | ?     | ?    | ?    | ?    | ?    | ? | ? |
| Bahinia         | ?   | ?   | ?   | ?   | ?   | ?   | ?   | ?   | ?   | ?    | ?     | ?    | ?    | ?    | ?    | ?    | ?    | ?    | ?    | ?    | ?    | ?    | ?    | ?     | ?    | ?    | ?    | ?    | ?    | ?    | ?     | ?    | ?    | ?    | ?    | ? | ? |
| Tarsius         | 1   | 0   | 0   | 1   | 1   | 2   | 1   | 2   | 1   | 1    | 2     | 1    | 1    | 1    | 1    | ?    | 1    | 1    | 1    | 1    | 2    | 0    | 2    | 2     | 1    | 0    | 1    | 2    | 1    | 0    | 1     | 2    | 1    | 0    | 0    | 0 |   |
| Xanthorthisis   | ?   | ?   | ?   | ?   | ?   | ?   | ?   | ?   | ?   | ?    | ?     | ?    | ?    | ?    | ?    | ?    | ?    | ?    | ?    | ?    | ?    | ?    | ?    | ?     | ?    | ?    | ?    | ?    | ?    | ?    | ?     | ?    | ?    | ?    | ?    | ? | ? |
| Aegyptopithecus | 1   | 0   | 1   | ?   | 0   | 1   | 1   | 2   | 1   | 0    | 2     | 1    | 1    | 1    | 0    | ?    | 0    | 0    | ?    | 0    | 0    | 1    | 0    | 2     | 0    | 1    | 1    | ?    | ?    | 1    | 1     | 2    | 2    | 1    | 1    | 1 |   |
| Moeripithecus   | ?   | ?   | ?   | ?   | ?   | ?   | ?   | ?   | ?   | ?    | ?     | ?    | ?    | ?    | ?    | ?    | ?    | ?    | ?    | ?    | ?    | ?    | ?    | ?     | ?    | ?    | ?    | ?    | ?    | ?    | ?     | ?    | ?    | ?    | ?    | ? | ? |
| Apidium         | 1   | 1   | 1   | 1   | ?   | 0   | ?   | 2   | 1   | 0    | 2     | 1    | 1    | 0    | ?    | ?    | ?    | ?    | ?    | ?    | ?    | ?    | ?    | ?     | ?    | ?    | ?    | ?    | ?    | ?    | ?     | ?    | ?    | ?    | ?    | ? |   |
| Arsinoea        | ?   | ?   | ?   | ?   | ?   | ?   | ?   | ?   | ?   | ?    | ?     | ?    | ?    | ?    | ?    | ?    | ?    | ?    | ?    | ?    | ?    | ?    | ?    | ?     | ?    | ?    | ?    | ?    | ?    | ?    | ?     | ?    | ?    | ?    | ?    | ? | ? |
| Catopithecus    | ?   | ?   | 1   | ?   | 0   | 0   | 1   | 2   | 1   | 0    | ?     | ?    | ?    | 1    | 0    | ?    | ?    | ?    | ?    | ?    | ?    | ?    | ?    | ?     | ?    | ?    | ?    | ?    | ?    | ?    | ?     | ?    | ?    | ?    | ?    | ? |   |
| Oligopithecus   | ?   | ?   | ?   | ?   | ?   | ?   | ?   | ?   | ?   | ?    | ?     | ?    | ?    | ?    | ?    | ?    | ?    | ?    | ?    | ?    | ?    | ?    | ?    | ?     | ?    | ?    | ?    | ?    | ?    | ?    | ?     | ?    | ?    | ?    | ?    | ? | ? |
| Parapithecus    | ?   | ?   | ?   | ?   | ?   | ?   | ?   | ?   | ?   | ?    | ?     | ?    | ?    | ?    | ?    | ?    | ?    | ?    | ?    | ?    | ?    | ?    | ?    | ?     | ?    | ?    | ?    | ?    | ?    | ?    | ?     | ?    | ?    | ?    | ?    | ? | ? |
| Protopithecus   | 1   | 1   | 1   | 1   | 0   | 0   | 1   | 2   | 1   | 0    | ?     | ?    | 1    | 1    | 0    | ?    | 0    | 0    | ?    | 0    | 0    | ?    | 0    | 2     | 0    | 1    | 1    | ?    | ?    | ?    | 1     | 1    | 2    | 2    | 1    | 1 |   |
| Qatrania        | ?   | ?   | ?   | ?   | ?   | ?   | ?   | ?   | ?   | ?    | ?     | ?    | ?    | ?    | ?    | ?    | ?    | ?    | ?    | ?    | ?    | ?    | ?    | ?     | ?    | ?    | ?    | ?    | ?    | ?    | ?     | ?    | ?    | ?    | ?    | ? | ? |
| Serapia         | ?   | ?   | ?   | ?   | ?   | ?   | ?   | ?   | ?   | ?    | ?     | ?    | ?    | ?    | ?    | ?    | ?    | ?    | ?    | ?    | ?    | ?    | ?    | ?     | ?    | ?    | ?    | ?    | ?    | ?    | ?     | ?    | ?    | ?    | ?    | ? | ? |
| Simonsius       | 1   | 1   | 1   | 1   | 0   | 0   | 1   | ?   | ?   | ?    |       |      |      |      |      |      |      |      |      |      |      |      |      |       |      |      |      |      |      |      |       |      |      |      |      |   |   |





| TAXA            | 278 | 279 | 280 | 281 | 282   | 283 | 284 | 285 | 286 | 287   | 288 | 289 | 290 | 291 | 292 | 293 | 294 | 295 | 296 | 297  | 298 | 299 | 300 | 301 | 302 | 303 | 304 | 305 | 306 | 307 | 308 | 309 | 310 | 311   | 312  |   |
|-----------------|-----|-----|-----|-----|-------|-----|-----|-----|-----|-------|-----|-----|-----|-----|-----|-----|-----|-----|-----|------|-----|-----|-----|-----|-----|-----|-----|-----|-----|-----|-----|-----|-----|-------|------|---|
| TAXA            | H18 | H19 | W1  | W2  | OP1   | OP2 | F1  | F2  | F3  | F4    | F5  | F6  | F7  | F8  | F9  | F10 | F11 | F12 | T1' | T1'' | T3  | T4  | T5  | T6  | T7  | A1  | A2' | A4' | A5' | A6  | A7  | A8  | A9  | GEB1  | GEB2 |   |
| Scandentia      | 1   | ?   | 0   | 0   | 0     | 1   | ?   | 1   | 0   | 0     | 0   | 0   | 1   | 0   | 0   | 0   | 0   | 0   | 0   | 0    | 0   | 0   | 0   | 0   | 0   | 1   | 0   | 0   | 0   | 0   | 1   | 0   | 1   | 1     | 0    |   |
| Paromomys       | ?   | ?   | ?   | ?   | ?     | ?   | ?   | ?   | ?   | ?     | ?   | ?   | ?   | ?   | ?   | ?   | ?   | ?   | ?   | ?    | ?   | ?   | ?   | ?   | ?   | ?   | ?   | ?   | ?   | ?   | ?   | ?   | ?   | ?     | ?    | ? |
| Plesiadapis     | ?   | ?   | ?   | ?   | ?     | ?   | 1   | 0   | 0   | 0     | 0   | 0   | 0   | 0   | 2   | 0   | 0   | 0   | 0   | 0    | 0   | 0   | 0   | 0   | 0   | 1   | 0   | 0   | 0   | 0   | ?   | 0   | 1   | 1     | 0    |   |
| Plesiolestes    | ?   | ?   | ?   | ?   | ?     | ?   | ?   | ?   | ?   | ?     | ?   | ?   | ?   | ?   | ?   | ?   | ?   | ?   | ?   | ?    | ?   | ?   | ?   | ?   | ?   | ?   | ?   | ?   | ?   | ?   | ?   | ?   | ?   | ?     | ?    | ? |
| Purgatorius     | ?   | ?   | ?   | ?   | ?     | ?   | ?   | ?   | ?   | ?     | ?   | ?   | ?   | ?   | ?   | ?   | ?   | ?   | ?   | ?    | ?   | ?   | ?   | ?   | ?   | ?   | ?   | ?   | ?   | ?   | ?   | ?   | ?   | ?     | ?    | ? |
| Adapis          | 0   | ?   | 0   | 1   | 0     | 0   | 1   | 0   | 0   | 0     | 0   | 0   | 0   | 0   | 1   | 0   | 1   | 1   | 0   | 0    | 1   | 2   | 2   | 0   | 1   | 0   | 2   | 2   | 0   | 1   | 0   | 1   | 1   | 2     | 1    |   |
| Notharctus      | ?   | 0   | ?   | ?   | ?     | ?   | 1   | 1   | 0   | 0     | 1   | 0   | 0   | 0   | 0   | 0   | 1   | 1   | 0   | 0    | 0   | 2   | 2   | 0   | 1   | 0   | 2   | 2   | 0   | 1   | 0   | 0   | 1   | 0     | 2    |   |
| Cantius         | ?   | ?   | ?   | ?   | ?     | ?   | ?   | ?   | ?   | ?     | ?   | ?   | ?   | ?   | ?   | ?   | ?   | ?   | ?   | ?    | ?   | ?   | ?   | ?   | ?   | ?   | 0   | 2   | 2   | 0   | 1   | ?   | ?   | 1     | 0    | 2 |
| Donrussellia    | ?   | ?   | ?   | ?   | ?     | ?   | ?   | ?   | ?   | ?     | ?   | ?   | ?   | ?   | ?   | ?   | ?   | ?   | ?   | ?    | ?   | ?   | ?   | ?   | ?   | ?   | ?   | ?   | ?   | ?   | ?   | ?   | ?   | ?     | ?    | ? |
| Leptadapis      | ?   | ?   | ?   | ?   | ?     | ?   | ?   | ?   | ?   | ?     | ?   | ?   | ?   | ?   | ?   | ?   | ?   | ?   | ?   | ?    | ?   | ?   | ?   | ?   | ?   | ?   | 0   | 2   | 2   | 0   | 1   | 0   | 0   | 1     | 2    | 2 |
| Mahgarita       | ?   | ?   | ?   | ?   | ?     | ?   | ?   | ?   | ?   | ?     | ?   | ?   | ?   | ?   | ?   | ?   | ?   | ?   | ?   | ?    | ?   | ?   | ?   | ?   | ?   | ?   | ?   | ?   | ?   | ?   | ?   | ?   | ?   | ?     | ?    | ? |
| Aframomius      | ?   | ?   | ?   | ?   | ?     | ?   | ?   | ?   | ?   | ?     | ?   | ?   | ?   | ?   | ?   | ?   | ?   | ?   | ?   | ?    | ?   | ?   | ?   | ?   | ?   | ?   | ?   | ?   | ?   | ?   | ?   | ?   | ?   | ?     | ?    | ? |
| Pronycticebus   | ?   | ?   | ?   | ?   | ?     | ?   | ?   | ?   | ?   | ?     | ?   | ?   | ?   | ?   | ?   | ?   | ?   | ?   | ?   | ?    | ?   | ?   | ?   | ?   | ?   | ?   | ?   | ?   | ?   | ?   | ?   | ?   | ?   | ?     | ?    | ? |
| Protoadapis     | ?   | ?   | ?   | ?   | ?     | ?   | ?   | ?   | ?   | ?     | ?   | ?   | ?   | ?   | ?   | ?   | ?   | ?   | ?   | ?    | ?   | ?   | ?   | ?   | ?   | ?   | ?   | ?   | ?   | ?   | ?   | ?   | ?   | ?     | ?    | ? |
| Guangxilemur    | ?   | ?   | ?   | ?   | ?     | ?   | ?   | ?   | ?   | ?     | ?   | ?   | ?   | ?   | ?   | ?   | ?   | ?   | ?   | ?    | ?   | ?   | ?   | ?   | ?   | ?   | ?   | ?   | ?   | ?   | ?   | ?   | ?   | ?     | ?    | ? |
| Hoanghoni       | ?   | ?   | ?   | ?   | ?     | ?   | ?   | ?   | ?   | ?     | ?   | ?   | ?   | ?   | ?   | ?   | ?   | ?   | ?   | ?    | ?   | ?   | ?   | ?   | ?   | ?   | ?   | ?   | ?   | ?   | ?   | ?   | ?   | ?     | ?    | ? |
| Sivaladapis     | ?   | ?   | ?   | ?   | ?     | ?   | ?   | ?   | ?   | ?     | ?   | ?   | ?   | ?   | ?   | ?   | ?   | ?   | ?   | ?    | ?   | ?   | ?   | ?   | ?   | ?   | ?   | ?   | ?   | ?   | ?   | ?   | ?   | ?     | ?    | ? |
| Galagoides      | 0   | 0   | 1   | 1   | 0     | 0   | 0   | 2   | 0   | 2     | 2   | 2   | 0   | 1   | 2   | 0   | 1   | 1   | 0   | 2    | 0   | 1   | 1   | 0   | 1   | 0   | 2   | 2   | 0   | 1   | 0   | 1   | 0   | ?     | ?    |   |
| Microcebus      | ?   | 1   | 1   | 1   | ?     | ?   | 1   | 1   | 0   | 1     | 1   | 0   | 0   | 0   | 0   | 0   | 1   | 1   | 0   | 1    | 1   | 2   | 2   | 0   | 1   | 0   | 2   | 2   | ?   | 1   | ?   | ?   | ?   | ?     | ?    |   |
| Nycticebus      | ?   | ?   | 1   | 1   | ?     | ?   | 0   | 0   | 1   | 1     | 0   | 0   | 0   | 2   | 0   | 1   | 1   | 0   | 0   | 1    | 2   | 2   | 0   | 1   | 0   | 2   | 2   | 0   | 1   | ?   | ?   | ?   | ?   | ?     | ?    |   |
| Lemur           | 0   | ?   | 1   | 1   | 0     | ?   | 1   | 2   | 0   | 0     | 1   | 0   | 0   | 0   | 0   | 0   | 1   | 1   | 0   | 0    | 1   | 2   | 2   | 0   | 1   | 0   | 2   | 2   | 0   | 1   | 0   | 1   | 0   | 1     | 2    |   |
| Absarokius      | ?   | ?   | ?   | ?   | ?     | ?   | ?   | ?   | ?   | ?     | ?   | ?   | ?   | ?   | ?   | ?   | ?   | ?   | ?   | ?    | ?   | ?   | ?   | ?   | ?   | ?   | 1   | 1   | 1   | 1   | 1   | ?   | ?   | ?     | ?    | ? |
| Anaptomorphus   | ?   | ?   | ?   | ?   | ?     | ?   | ?   | ?   | ?   | ?     | ?   | ?   | ?   | ?   | ?   | ?   | ?   | ?   | ?   | ?    | ?   | ?   | ?   | ?   | ?   | ?   | ?   | ?   | ?   | ?   | ?   | ?   | ?   | ?     | ?    | ? |
| Anemorthisis    | ?   | ?   | ?   | ?   | ?     | ?   | ?   | ?   | ?   | ?     | ?   | ?   | ?   | ?   | ?   | ?   | ?   | ?   | ?   | ?    | ?   | ?   | ?   | ?   | ?   | ?   | ?   | ?   | ?   | ?   | ?   | ?   | ?   | ?     | ?    | ? |
| Arapaphovius    | ?   | ?   | ?   | ?   | ?     | ?   | ?   | ?   | ?   | ?     | ?   | ?   | ?   | ?   | ?   | ?   | ?   | ?   | ?   | ?    | ?   | ?   | ?   | ?   | ?   | ?   | ?   | ?   | ?   | ?   | ?   | ?   | ?   | ?     | ?    | ? |
| Dysolemur       | ?   | ?   | ?   | ?   | ?     | ?   | ?   | ?   | ?   | ?     | ?   | ?   | ?   | ?   | ?   | ?   | ?   | ?   | ?   | ?    | ?   | ?   | ?   | ?   | ?   | ?   | ?   | ?   | ?   | ?   | ?   | ?   | ?   | ?     | ?    | ? |
| Hemiacodon      | ?   | ?   | ?   | ?   | ?     | ?   | 0   | 0   | 0   | 2     | 1   | 1   | 1   | 1   | 0   | 1   | 1   | 0   | 1   | 0    | 1   | 0   | 1   | 1   | 0   | 1   | 1   | 1   | 1   | 1   | 1   | 0   | 0   | 1     | 1    | 1 |
| Loveina         | ?   | ?   | ?   | ?   | ?     | ?   | ?   | ?   | ?   | ?     | ?   | ?   | ?   | ?   | ?   | ?   | ?   | ?   | ?   | ?    | ?   | ?   | ?   | ?   | ?   | ?   | ?   | ?   | ?   | ?   | ?   | ?   | ?   | ?     | ?    | ? |
| Macrotarsius    | ?   | ?   | ?   | ?   | ?     | ?   | ?   | ?   | ?   | ?     | ?   | ?   | ?   | ?   | ?   | ?   | ?   | ?   | ?   | ?    | ?   | ?   | ?   | ?   | ?   | ?   | ?   | ?   | ?   | ?   | ?   | ?   | ?   | ?     | ?    | ? |
| Microchoerus    | ?   | ?   | ?   | ?   | ?     | ?   | ?   | ?   | 0   | ?     | ?   | ?   | 1   | 1   | 2   | 0   | 1   | ?   | ?   | ?    | ?   | ?   | ?   | ?   | ?   | ?   | 1   | 1   | 2   | 0   | 1   | 1   | 0   | 0     | 2    | 2 |
| Nannopithec     | ?   | ?   | ?   | ?   | ?     | ?   | ?   | ?   | 0   | 2     | ?   | 0   | 1   | 1   | ?   | ?   | ?   | ?   | ?   | ?    | ?   | ?   | ?   | ?   | ?   | ?   | ?   | ?   | ?   | ?   | ?   | ?   | ?   | ?     | ?    | ? |
| Necrolemur      | ?   | ?   | ?   | ?   | 0     | 0   | 2   | 1   | 1   | 2     | 2   | 0   | 1   | 1   | 0   | 1   | 1   | ?   | 1   | ?    | 0   | 1   | 1   | 1   | 0   | 1   | 1   | 1   | 1   | 1   | 1   | 0   | 0   | 0     | 1    | 1 |
| Omomys          | ?   | ?   | ?   | ?   | ?     | 0   | 0   | 0   | 2   | 0     | 0   | ?   | 0   | 1   | 1   | 2   | ?   | ?   | ?   | 0    | 1   | 0   | 1   | 1   | ?   | 0   | 1   | 1   | 1   | 1   | 0   | 0   | 1   | 1     | 1    |   |
| Shoshonius      | 0   | 0   | ?   | ?   | 0     | 0   | 0   | 2   | 0   | 0     | 2   | 1   | 1   | 1   | 1   | 0   | ?   | ?   | 0   | 2    | 0   | 1   | 1   | 1   | 0   | 1   | 1   | 1   | 1   | 1   | 0   | 0   | 0   | 1     | 1    |   |
| Steinius        | ?   | ?   | ?   | ?   | ?     | ?   | ?   | ?   | ?   | ?     | ?   | ?   | ?   | ?   | ?   | ?   | ?   | ?   | ?   | ?    | ?   | ?   | ?   | ?   | ?   | ?   | ?   | ?   | ?   | ?   | ?   | ?   | ?   | ?     | ?    | ? |
| Strigorthisis   | ?   | ?   | ?   | ?   | ?     | ?   | ?   | ?   | ?   | ?     | ?   | ?   | ?   | ?   | ?   | ?   | ?   | ?   | ?   | ?    | ?   | ?   | ?   | ?   | ?   | ?   | ?   | ?   | ?   | ?   | ?   | ?   | ?   | ?     | ?    | ? |
| Teilhardina_A   | ?   | ?   | ?   | ?   | ?     | ?   | ?   | ?   | ?   | ?     | ?   | ?   | ?   | ?   | ?   | ?   | ?   | ?   | ?   | ?    | ?   | ?   | ?   | ?   | ?   | ?   | ?   | ?   | ?   | ?   | ?   | ?   | ?   | ?     | ?    | ? |
| Teilhardina_B   | ?   | ?   | ?   | ?   | ?     | ?   | ?   | ?   | ?   | ?     | ?   | ?   | ?   | ?   | ?   | ?   | ?   | ?   | ?   | ?    | ?   | ?   | ?   | ?   | ?   | ?   | ?   | ?   | ?   | ?   | ?   | ?   | ?   | ?     | ?    | ? |
| Tetonius        | ?   | ?   | ?   | ?   | ?     | ?   | ?   | ?   | ?   | ?     | ?   | ?   | ?   | ?   | ?   | ?   | ?   | ?   | ?   | ?    | ?   | ?   | ?   | ?   | ?   | ?   | ?   | ?   | ?   | ?   | ?   | ?   | ?   | ?     | ?    | ? |
| Uintanius       | ?   | ?   | ?   | ?   | ?     | ?   | ?   | ?   | ?   | ?     | ?   | ?   | ?   | ?   | ?   | ?   | ?   | ?   | ?   | ?    | ?   | ?   | ?   | ?   | ?   | ?   | ?   | ?   | ?   | ?   | ?   | ?   | ?   | ?     | ?    | ? |
| Washakius       | ?   | ?   | ?   | ?   | ?     | ?   | ?   | ?   | ?   | ?     | ?   | ?   | ?   | ?   | ?   | ?   | ?   | ?   | ?   | ?    | ?   | ?   | ?   | ?   | ?   | ?   | ?   | ?   | ?   | ?   | ?   | ?   | ?   | ?     | ?    | ? |
| Afrotarsius     | ?   | ?   | ?   | ?   | ?     | ?   | ?   | ?   | ?   | ?     | ?   | ?   | ?   | ?   | ?   | ?   | ?   | ?   | ?   | ?    | ?   | ?   | ?   | ?   | ?   | ?   | ?   | ?   | ?   | ?   | ?   | ?   | ?   | ?     | ?    | ? |
| Eosimias        | 1   | ?   | ?   | ?   | ?     | ?   | ?   | ?   | ?   | ?     | ?   | ?   | ?   | ?   | ?   | ?   | ?   | ?   | ?   | ?    | ?   | ?   | ?   | ?   | ?   | ?   | ?   | ?   | ?   | ?   | ?   | ?   | ?   | ?     | ?    | ? |
| Phenacopithecus | ?   | ?   | ?   | ?   | ?     | ?   | ?   | ?   | ?   | ?     | ?   | ?   | ?   | ?   | ?   | ?   | ?   | ?   | ?   | ?    | ?   | ?   | ?   | ?   | ?   | ?   | ?   | ?   | ?   | ?   | ?   | ?   | ?   | ?     | ?    | ? |
| Bahinia         | ?   | ?   | ?   | ?   | ?     | ?   | ?   | ?   | ?   | ?     | ?   | ?   | ?   | ?   | ?   | ?   | ?   | ?   | ?   | ?    | ?   | ?   | ?   | ?   | ?   | ?   | ?   | ?   | ?   | ?   | ?   | ?   | ?   | ?     | ?    | ? |
| Tarsius         | 0   | 0   | 0   | 0   | 0     | 0   | 0   | 2   | 0   | 0     | 2   | 2   | 1   | 1   | 2   | 0   | 1   | 1   | ?   | ?    | ?   | ?   | ?   | ?   | ?   | ?   | ?   | ?   | ?   | ?   | ?   | ?   | ?   | ?     | ?    |   |
| Xanthorthisis   | ?   | ?   | ?   | ?   | ?     | ?   | ?   | ?   | ?   | ?     | ?   | ?   | ?   | ?   | ?   | ?   | ?   | ?   | ?   | ?    | ?   | ?   | ?   | ?   | ?   | ?   | ?   | ?   | ?   | ?   | ?   | ?   | ?   | ?     | ?    | ? |
| Aegyptopithecus | 1   | 2   | ?   | ?   | 0     | 1   | ?   | 0   | ?   | 1 & 2 | 0   | ?   | 0   | ?   | ?   | 0   | ?   | ?   | 0   | 0    | ?   | ?   | ?   | ?   | ?   | ?   | ?   | ?   | ?   | ?   | ?   | ?   | ?   | ?     | ?    |   |
| Moeripithecus   | ?   | ?   | ?   | ?   | ?     | ?   | ?   | ?   | ?   | ?     | ?   | ?   | ?   | ?   | ?   | ?   | ?   | ?   | ?   | ?    | ?   | ?   | ?   | ?   | ?   | ?   | ?   | ?   | ?   | ?   | ?   | ?   | ?   | ?     | ?    | ? |
| Apidium         | 1   | 0   | ?   | ?   | 1     | ?   | 2   | 1   | 1   | 2     | 2   | 0   | 0   | 0   | 0   | 1   | 0   | 0   | 0   | 2    | 0   | 1   | 1   | 0   | 1   | 1   | 1   | 0   | 1   | 0   | 0   | 0   | 0   | 0 & 1 | 2    | 2 |
| Arsinoea        | ?   | ?   | ?   | ?   | ?     | ?   | ?   | ?   | ?   | ?     | ?   | ?   | ?   | ?   | ?   | ?   | ?   | ?   | ?   | ?    | ?   | ?   | ?   | ?   | ?   | ?   | ?   | ?   | ?   | ?   | ?   | ?   | ?   | ?     | ?    | ? |
| Catopithecus    | 1   | 2   | ?   | ?   | 0     | 1   | 1   | 2   | 1   | 0     | ?   | 0   | 0   | 0   | 0   | 0   | ?   | ?   | ?   | ?    | ?   | ?   | ?   | ?   | ?   | ?   | ?   | ?   | ?   | ?   | ?   | ?   | ?   | ?     | ?    |   |
| Oligopithecus   | ?   | ?   | ?   | ?   | ?     | ?   | ?   | ?   | ?   | ?     | ?   | ?   | ?   | ?   | ?   | ?   | ?   | ?   | ?   | ?    | ?   | ?   | ?   | ?   | ?   | ?   | ?   | ?   | ?   | ?   | ?   | ?   | ?   | ?     | ?    | ? |
| Parapithecus    | ?   | ?   | ?   | ?   | ?     | ?   | ?   | ?   | ?   | ?     | ?   | ?   | ?   | ?   | ?   | ?   | ?   | ?   | ?   | ?    | ?   | ?   | ?   | ?   | ?   | ?   | ?   | ?   | ?   | ?   | ?   | ?   | ?   | ?     | ?    | ? |
| Proteopithecus  | 1   | 1   | ?   | ?   | 0     | 0   | 2   | 2   | 1   | 0     | 1   | 0   | ?   | 0   | ?   | 1   | 0   | ?   | ?   | ?    | ?   | ?   | ?   | ?   | ?   | ?   | ?   | ?   | ?   | ?   | ?   | ?   | ?   | ?     | ?    |   |
| Qatrania        | ?   | ?   | ?   | ?   | ?     | ?   | ?   | ?   | ?   | ?     | ?   | ?   | ?   | ?   | ?   | ?   | ?   | ?   | ?   | ?    | ?   | ?   | ?   | ?   | ?   | ?   | ?   | ?   | ?   | ?   | ?   | ?   | ?   | ?     | ?    | ? |
| Serapia         | ?   | ?   | ?   | ?   | ?     | ?   | ?   | ?   | ?   | ?     | ?   | ?   | ?   | ?   | ?   | ?   | ?   | ?   | ?   | ?    | ?   | ?   | ?   | ?   | ?   | ?   | ?   | ?   | ?   | ?   | ?   | ?   | ?   | ?     | ?    | ? |
| Simonsius       | ?   | ?   | ?   | ?   | 1     | ?   | ?   | ?   | ?   | ?     | ?   | ?   | ?   | ?   | ?   | ?   | ?   | ?   | ?   | ?    | ?   | ?   | ?   | ?   | ?   | ?   | ?   | ?   | ?   | ?   | ?   | ?   | ?   | ?     | ?    | ? |
| Aotus           | 1   | ?   | 0   | 0   | 0 & 1 | 0   | 2   | 0   | 1   | 2     | 1   | 0   | 0   | 0   | 1   | 0   | 2   | 0   | 0   | 2    | 0   |     |     |     |     |     |     |     |     |     |     |     |     |       |      |   |

| TAXA            | 313  | 314 | 315 | 316 | 317 | 318 | 319 | 320 | 321 | 322 | 323 | 324 | 325 | 326 | 327 | 328 | 329 | 330 | 331  | 332  | 333  | 334 | 335 | 336 | 337 | 338 | 339 |
|-----------------|------|-----|-----|-----|-----|-----|-----|-----|-----|-----|-----|-----|-----|-----|-----|-----|-----|-----|------|------|------|-----|-----|-----|-----|-----|-----|
| TAXA            | GEB3 | CA1 | CA2 | CA3 | CA4 | N1  | N3  | E1  | E2  | O1  | O2  | O3  | O4  | MT1 | MT2 | V1  | V2  | 289 | MOL1 | MOL2 | MOL4 | PL1 | PL2 | PL3 | PL4 | PL5 | PL6 |
| Scandentia      | 0    | 0   | 0   | 0   | 0   | 0   | 0   | 0   | 0   | 0   | 1   | 0   | 1   | 2   | 0   | 0   | 0   | 0   | 0    | 0    | 0    | 0   | 0   | 0   | 0   | 0   | 0   |
| Paromomys       | ?    | ?   | ?   | ?   | ?   | ?   | ?   | ?   | ?   | ?   | ?   | ?   | ?   | ?   | ?   | ?   | ?   | ?   | ?    | ?    | ?    | ?   | ?   | ?   | ?   | ?   | ?   |
| Plesiadapis     | 0    | 0   | 0   | 0   | ?   | ?   | ?   | 0   | 1   | ?   | ?   | 0   | ?   | ?   | ?   | ?   | ?   | ?   | ?    | ?    | ?    | ?   | ?   | ?   | ?   | ?   | ?   |
| Plesiolestes    | ?    | ?   | ?   | ?   | ?   | ?   | ?   | ?   | ?   | ?   | ?   | ?   | ?   | ?   | ?   | 0   | ?   | ?   | ?    | ?    | ?    | ?   | ?   | ?   | ?   | ?   | ?   |
| Purgatorius     | ?    | ?   | ?   | ?   | ?   | ?   | ?   | ?   | ?   | ?   | ?   | ?   | ?   | ?   | ?   | ?   | ?   | ?   | ?    | ?    | ?    | ?   | ?   | ?   | ?   | ?   | ?   |
| Adapis          | 1    | 1   | 1   | 0   | 1   | ?   | ?   | 0   | 0   | ?   | ?   | 1   | ?   | 2   | ?   | 0   | 0   | ?   | ?    | ?    | ?    | ?   | ?   | ?   | ?   | ?   | ?   |
| Notharctus      | 0    | 1   | 1   | 0   | ?   | 1   | 1   | ?   | ?   | 0   | ?   | 1   | ?   | 1   | ?   | 0   | 0   | ?   | ?    | ?    | ?    | ?   | ?   | ?   | ?   | ?   | ?   |
| Cantius         | 0    | ?   | ?   | ?   | ?   | ?   | ?   | ?   | ?   | ?   | ?   | ?   | ?   | ?   | ?   | ?   | ?   | ?   | ?    | ?    | ?    | ?   | ?   | ?   | ?   | ?   | ?   |
| Donrussellia    | ?    | ?   | ?   | ?   | ?   | ?   | ?   | ?   | ?   | ?   | ?   | ?   | ?   | ?   | ?   | ?   | 0   | ?   | ?    | ?    | ?    | ?   | ?   | ?   | ?   | ?   | ?   |
| Leptadapis      | 1    | 1   | 2   | ?   | ?   | ?   | ?   | 0   | 0   | ?   | ?   | 1   | ?   | 2   | ?   | 0   | 0   | ?   | ?    | ?    | ?    | ?   | ?   | ?   | ?   | ?   | ?   |
| Mahgarita       | ?    | ?   | ?   | ?   | ?   | ?   | ?   | ?   | ?   | ?   | ?   | ?   | ?   | ?   | ?   | 0   | 0   | ?   | ?    | ?    | ?    | ?   | ?   | ?   | ?   | ?   | ?   |
| Aframomius      | ?    | ?   | ?   | ?   | ?   | ?   | ?   | ?   | ?   | ?   | ?   | ?   | ?   | ?   | ?   | ?   | ?   | ?   | ?    | ?    | ?    | ?   | ?   | ?   | ?   | ?   | ?   |
| Pronycticebus   | ?    | ?   | ?   | ?   | ?   | ?   | ?   | ?   | ?   | ?   | ?   | ?   | ?   | ?   | ?   | 0   | 0   | ?   | ?    | ?    | ?    | ?   | ?   | ?   | ?   | ?   | ?   |
| Protoadapis     | ?    | ?   | ?   | ?   | ?   | ?   | ?   | ?   | 1   | ?   | ?   | ?   | ?   | ?   | ?   | ?   | ?   | ?   | ?    | ?    | ?    | ?   | ?   | ?   | ?   | ?   | ?   |
| Guangxilemur    | ?    | ?   | ?   | ?   | ?   | ?   | ?   | ?   | ?   | ?   | ?   | ?   | ?   | ?   | ?   | ?   | ?   | ?   | ?    | ?    | ?    | ?   | ?   | ?   | ?   | ?   | ?   |
| Hoanghoni       | ?    | ?   | ?   | ?   | ?   | ?   | ?   | ?   | ?   | ?   | ?   | ?   | ?   | ?   | ?   | ?   | ?   | ?   | ?    | ?    | ?    | ?   | ?   | ?   | ?   | ?   | ?   |
| Sivaladapis     | ?    | ?   | ?   | ?   | ?   | ?   | ?   | ?   | ?   | ?   | ?   | ?   | ?   | ?   | ?   | ?   | ?   | ?   | ?    | ?    | ?    | ?   | ?   | ?   | ?   | ?   | ?   |
| Galagoides      | ?    | 1   | 2   | 0   | 0   | 2   | 1   | 0   | 0   | ?   | 1   | 1   | 0   | 0   | 1   | 0   | 0   | 0   | 0    | 0    | 0    | 0   | 0   | 0   | 0   | 0   | 0   |
| Microcebus      | ?    | 2   | 2   | 0   | ?   | 2   | 1   | 0   | 0   | ?   | 1   | 1   | 0   | 1   | 1   | 0   | 0   | 0   | 0    | 0    | 0    | 0   | 0   | 0   | 0   | 0   | 0   |
| Nycticebus      | ?    | 1   | 2   | 0   | ?   | 1   | 1   | 0   | 0   | ?   | 1   | 1   | 0   | 2   | 1   | 0   | 0   | 0   | 0    | 0    | 0    | 0   | 0   | 0   | 0   | 0   | 0   |
| Lemur           | 1    | 1   | 2   | 0   | ?   | 1   | 1   | 0   | 0   | ?   | 1   | 1   | 0   | 1   | 1   | 0   | 0   | 0   | 0    | 0    | 0    | 0   | 0   | 0   | 0   | 0   | 0   |
| Absarokius      | 0    | 1   | 1   | 0   | ?   | ?   | ?   | ?   | ?   | ?   | ?   | ?   | ?   | ?   | ?   | ?   | ?   | ?   | ?    | ?    | ?    | ?   | ?   | ?   | ?   | ?   | ?   |
| Anaptomorphus   | ?    | ?   | ?   | ?   | ?   | ?   | ?   | ?   | ?   | ?   | ?   | ?   | ?   | ?   | ?   | ?   | ?   | ?   | ?    | ?    | ?    | ?   | ?   | ?   | ?   | ?   | ?   |
| Anemorthis      | ?    | ?   | ?   | ?   | ?   | ?   | ?   | ?   | ?   | ?   | ?   | ?   | ?   | ?   | ?   | ?   | ?   | ?   | ?    | ?    | ?    | ?   | ?   | ?   | ?   | ?   | ?   |
| Arapaphovius    | 0    | 2   | 1   | 0   | ?   | 2   | 0   | 1   | ?   | ?   | ?   | 1   | ?   | 0   | ?   | ?   | ?   | ?   | ?    | ?    | ?    | ?   | ?   | ?   | ?   | ?   | ?   |
| Dysolemur       | ?    | ?   | ?   | ?   | ?   | ?   | ?   | ?   | ?   | ?   | ?   | ?   | ?   | ?   | ?   | ?   | ?   | ?   | ?    | ?    | ?    | ?   | ?   | ?   | ?   | ?   | ?   |
| Hemiacodon      | 0    | 1   | 1   | 0   | ?   | 2   | 0   | 1   | 1   | ?   | ?   | 1   | ?   | 0   | ?   | ?   | ?   | ?   | ?    | ?    | ?    | ?   | ?   | ?   | ?   | ?   | ?   |
| Loveina         | ?    | ?   | ?   | ?   | ?   | ?   | ?   | ?   | ?   | ?   | ?   | ?   | ?   | ?   | ?   | ?   | ?   | ?   | ?    | ?    | ?    | ?   | ?   | ?   | ?   | ?   | ?   |
| Macrotrarsius   | ?    | ?   | ?   | ?   | ?   | ?   | ?   | ?   | ?   | ?   | ?   | ?   | ?   | ?   | ?   | ?   | ?   | ?   | ?    | ?    | ?    | ?   | ?   | ?   | ?   | ?   | ?   |
| Microchoerus    | 0    | 1   | ?   | ?   | ?   | ?   | ?   | ?   | ?   | ?   | ?   | ?   | ?   | ?   | ?   | 0   | ?   | ?   | ?    | ?    | ?    | ?   | ?   | ?   | ?   | ?   | ?   |
| Nannopithec     | ?    | ?   | ?   | ?   | ?   | ?   | ?   | ?   | ?   | ?   | ?   | ?   | ?   | ?   | ?   | 0   | 0   | ?   | ?    | ?    | ?    | ?   | ?   | ?   | ?   | ?   | ?   |
| Necrolemur      | 0    | 1   | ?   | 1   | ?   | ?   | ?   | ?   | ?   | ?   | ?   | 1   | ?   | 0   | ?   | 0   | 0   | ?   | ?    | ?    | ?    | ?   | ?   | ?   | ?   | ?   | ?   |
| Omomys          | 0    | 1   | 1   | 0   | ?   | 2   | ?   | ?   | ?   | ?   | ?   | ?   | ?   | ?   | ?   | 0   | 0   | ?   | ?    | ?    | ?    | ?   | ?   | ?   | ?   | ?   | ?   |
| Shoshonius      | 0    | 2   | 1   | 0   | ?   | ?   | ?   | 1   | ?   | ?   | ?   | ?   | ?   | 0   | ?   | 0   | 0   | ?   | ?    | ?    | ?    | ?   | ?   | ?   | ?   | ?   | ?   |
| Steinius        | ?    | ?   | ?   | ?   | ?   | ?   | ?   | ?   | ?   | ?   | ?   | ?   | ?   | ?   | ?   | ?   | ?   | ?   | ?    | ?    | ?    | ?   | ?   | ?   | ?   | ?   | ?   |
| Strigorthis     | ?    | ?   | ?   | ?   | ?   | ?   | ?   | ?   | ?   | ?   | ?   | ?   | ?   | ?   | ?   | ?   | ?   | ?   | ?    | ?    | ?    | ?   | ?   | ?   | ?   | ?   | ?   |
| Teilhardina_A   | ?    | 2   | 0   | 0   | ?   | ?   | ?   | ?   | ?   | ?   | ?   | ?   | ?   | ?   | ?   | ?   | ?   | ?   | ?    | ?    | ?    | ?   | ?   | ?   | ?   | ?   | ?   |
| Teilhardina_B   | 0    | 2   | ?   | ?   | ?   | ?   | ?   | ?   | ?   | ?   | ?   | ?   | ?   | ?   | ?   | ?   | ?   | ?   | ?    | ?    | ?    | ?   | ?   | ?   | ?   | ?   | ?   |
| Tetonius        | ?    | 1   | ?   | ?   | ?   | ?   | ?   | ?   | ?   | ?   | ?   | ?   | ?   | ?   | ?   | ?   | ?   | ?   | ?    | ?    | ?    | ?   | ?   | ?   | ?   | ?   | ?   |
| Uintanius       | ?    | ?   | ?   | ?   | ?   | ?   | ?   | ?   | ?   | ?   | ?   | ?   | ?   | ?   | ?   | ?   | ?   | ?   | ?    | ?    | ?    | ?   | ?   | ?   | ?   | ?   | ?   |
| Washakius       | ?    | 2   | ?   | ?   | ?   | ?   | ?   | ?   | ?   | ?   | ?   | ?   | ?   | ?   | ?   | ?   | ?   | ?   | ?    | ?    | ?    | ?   | ?   | ?   | ?   | ?   | ?   |
| Afrotarsius     | ?    | ?   | ?   | ?   | ?   | ?   | ?   | ?   | ?   | ?   | ?   | ?   | ?   | ?   | ?   | ?   | ?   | ?   | ?    | ?    | ?    | ?   | ?   | ?   | ?   | ?   | ?   |
| Eosimias        | 0    | 0   | 1   | ?   | ?   | ?   | ?   | ?   | ?   | ?   | ?   | ?   | ?   | 2   | ?   | ?   | ?   | ?   | ?    | ?    | ?    | ?   | ?   | ?   | ?   | ?   | ?   |
| Phenacopithecus | ?    | ?   | ?   | ?   | ?   | ?   | ?   | ?   | ?   | ?   | ?   | ?   | ?   | ?   | ?   | ?   | ?   | ?   | ?    | ?    | ?    | ?   | ?   | ?   | ?   | ?   | ?   |
| Bahinia         | ?    | ?   | ?   | ?   | ?   | ?   | ?   | ?   | ?   | ?   | ?   | ?   | ?   | ?   | ?   | ?   | ?   | ?   | ?    | ?    | ?    | ?   | ?   | ?   | ?   | ?   | ?   |
| Tarsius         | 0    | 1   | 1   | 1   | 0   | 2   | 0   | 1   | 1   | 2   | 1   | 1   | 0   | 1   | 1   | 1   | 1   | 1   | 1    | 1    | 1    | 1   | 1   | 1   | 1   | 1   | 1   |
| Xanthorthis     | ?    | ?   | ?   | ?   | ?   | ?   | ?   | ?   | ?   | ?   | ?   | ?   | ?   | ?   | ?   | ?   | ?   | ?   | ?    | ?    | ?    | ?   | ?   | ?   | ?   | ?   | ?   |
| Aegyptopithecus | 1    | 0   | 1   | 0   | 1   | ?   | ?   | 2   | 1   | ?   | ?   | 0   | ?   | 2   | 0   | 1   | 1   | ?   | ?    | ?    | ?    | ?   | ?   | ?   | ?   | ?   | ?   |
| Moeripithecus   | ?    | ?   | ?   | ?   | ?   | ?   | ?   | ?   | ?   | ?   | ?   | ?   | ?   | ?   | ?   | ?   | ?   | ?   | ?    | ?    | ?    | ?   | ?   | ?   | ?   | ?   | ?   |
| Apidium         | 1    | 0   | 1   | 0   | 1   | 0   | 0   | 2   | 1   | ?   | ?   | ?   | ?   | ?   | 0   | 1   | 1   | ?   | ?    | ?    | ?    | ?   | ?   | ?   | ?   | ?   | ?   |
| Arsinoea        | ?    | ?   | ?   | ?   | ?   | ?   | ?   | ?   | ?   | ?   | ?   | ?   | ?   | ?   | ?   | ?   | ?   | ?   | ?    | ?    | ?    | ?   | ?   | ?   | ?   | ?   | ?   |
| Catopithecus    | 1    | ?   | ?   | ?   | ?   | ?   | ?   | ?   | ?   | ?   | ?   | ?   | ?   | ?   | ?   | 1   | 1   | ?   | ?    | ?    | ?    | ?   | ?   | ?   | ?   | ?   | ?   |
| Oligopithecus   | ?    | ?   | ?   | ?   | ?   | ?   | ?   | ?   | ?   | ?   | ?   | ?   | ?   | ?   | ?   | ?   | ?   | ?   | ?    | ?    | ?    | ?   | ?   | ?   | ?   | ?   | ?   |
| Parapithecus    | ?    | ?   | ?   | ?   | ?   | ?   | ?   | ?   | ?   | ?   | ?   | ?   | ?   | ?   | ?   | ?   | ?   | ?   | ?    | ?    | ?    | ?   | ?   | ?   | ?   | ?   | ?   |
| Proteopithecus  | 1    | ?   | ?   | ?   | ?   | ?   | ?   | ?   | ?   | ?   | ?   | ?   | ?   | ?   | ?   | 1   | 1   | ?   | ?    | ?    | ?    | ?   | ?   | ?   | ?   | ?   | ?   |
| Qatrania        | ?    | ?   | ?   | ?   | ?   | ?   | ?   | ?   | ?   | ?   | ?   | ?   | ?   | ?   | ?   | ?   | ?   | ?   | ?    | ?    | ?    | ?   | ?   | ?   | ?   | ?   | ?   |
| Serapia         | ?    | ?   | ?   | ?   | ?   | ?   | ?   | ?   | ?   | ?   | ?   | ?   | ?   | ?   | ?   | ?   | ?   | ?   | ?    | ?    | ?    | ?   | ?   | ?   | ?   | ?   | ?   |
| Simonsius       | ?    | ?   | ?   | ?   | ?   | ?   | ?   | ?   | ?   | ?   | ?   | ?   | ?   | ?   | ?   | 1   | 1   | ?   | ?    | ?    | ?    | ?   | ?   | ?   | ?   | ?   | ?   |
| Aotus           | 0    | 1   | 1   | ?   | 1   | 0   | 0   | 2   | 1   | 1   | 0   | 0   | 1   | 2   | 0   | 1   | 1   | 1   | 1    | 1    | 1    | 1   | 1   | 1   | 1   | 1   | 1   |
| Saimiri         | 0    | 2   | 1   | ?   | 1   | 0   | 0   | 2   | 1   | 1   | 0   | 0   | 1   | 2   | 0   | 1   | 1   | 1   | 1    | 1    | 1    | 1   | 1   | 1   | 1   | 1   | 1   |
| Callicebus      | 0    | 1   | 1   | 0   | ?   | 0   | 0   | 2   | 1   | 1   | 0   | 0   | 1   | 2   | 0   | 1   | 1   | 1   | 1    | 1    | 1    | 1   | 1   | 1   | 1   | 1   | 1   |
| Neosaimiri      | ?    | ?   | ?   | ?   | ?   | ?   | ?   | ?   | ?   | ?   | ?   | ?   | ?   | ?   | ?   | ?   | ?   | ?   | ?    | ?    | ?    | ?   | ?   | ?   | ?   | ?   | ?   |
| Dolichocebus    | ?    | ?   | ?   | ?   | ?   | ?   | ?   | ?   | ?   | ?   | ?   | ?   | ?   | ?   | ?   | 1   | 1   | ?   | ?    | ?    | ?    | ?   | ?   | ?   | ?   | ?   | ?   |
| Branisella      | ?    | ?   | ?   | ?   | ?   | ?   | ?   | ?   | ?   | ?   | ?   | ?   | ?   | ?   | ?   | ?   | ?   | ?   | ?    | ?    | ?    | ?   | ?   | ?   | ?   | ?   | ?   |
| Myanmarpithecus | ?    | ?   | ?   | ?   | ?   | ?   | ?   | ?   | ?   | ?   | ?   | ?   | ?   | ?   | ?   | ?   | ?   | ?   | ?    | ?    | ?    | ?   | ?   | ?   | ?   | ?   | ?   |
| Pondaungia      | 1    | 0   | 1   | ?   | ?   | ?   | ?   | ?   | ?   | ?   | ?   | ?   | ?   | ?   | ?   | 0   | 0   | ?   | ?    | ?    | ?    | ?   | ?   | ?   | ?   | ?   | ?   |
| Siamopithecus   | ?    | ?   | ?   | ?   | ?   | ?   | ?   | ?   | ?   | ?   | ?   | ?   | ?   | ?   | ?   | ?   | ?   | ?   | ?    | ?    | ?    | ?   | ?   | ?   | ?   | ?   | ?   |
| Bugtipithecus   | ?    | ?   | ?   | ?   | ?   | ?   | ?   | ?   | ?   | ?   | ?   | ?   | ?   | ?   | ?   | ?   | ?   | ?   | ?    | ?    | ?    | ?   | ?   | ?   | ?   | ?   | ?   |
| Philoesimias    | ?    | ?   | ?   | ?   | ?   | ?   | ?   | ?   | ?   | ?   | ?   | ?   | ?   | ?   | ?   | ?   | ?   | ?   | ?    | ?    | ?    | ?   | ?   | ?   | ?   | ?   | ?   |
|                 | GEB3 | CA1 | CA2 | CA3 | CA4 | N1  | N3  | E1  | E2  | O1  | O2  | O3  | O4  | MT1 | MT2 | V1  | V2  | 289 | MOL1 | MOL2 | MOL4 | PL1 | PL2 | PL3 | PL4 | PL5 | PL6 |

## TAXONS

---

|                                                                |                                                            |
|----------------------------------------------------------------|------------------------------------------------------------|
| Scandentia                                                     | <i>Teilhardina americana</i>                               |
| <i>Plesiadapis tricuspidens</i> and <i>P. jepi</i>             | <i>Teilhardina belgica</i>                                 |
| <i>Plesiolestes problematicus</i>                              | <i>Tetonius</i> sp. - <i>homunculus</i>                    |
| <i>Paromomys maurus</i> - <i>depressidens</i>                  | <i>Uintanius ameghini</i>                                  |
| <i>Purgatorius unio</i>                                        | <i>Washakius insignis</i> - <i>woodringi</i>               |
| <i>Adapis parisiensis</i>                                      | <i>Afrotarsius chatrathi</i>                               |
| <i>Notharctus robustior</i>                                    | <i>Eosimias</i> sp. - <i>sinensis</i> - <i>centennicus</i> |
| <i>Cantius eppsi</i>                                           | <i>Phenacopithecus krishtalkai</i> - <i>xueshii</i>        |
| <i>Donrussellia</i> sp. <i>gallica</i>                         | <i>Bahinia pondaungensis</i>                               |
| <i>Leptadapis magnus</i>                                       | <i>Tarsius</i> sp. - <i>spectrum</i>                       |
| <i>Mahgarita stevensi</i>                                      | <i>Xanthorhysis tabrumi</i>                                |
| <i>Aframomius dieides</i>                                      | <i>Aegyptopithecus zeuxis</i>                              |
| <i>Pronycticebus gaudryi</i>                                   | <i>Moeripithecus markgrafi</i>                             |
| <i>Protoadapis curvicuspidens</i>                              | <i>Apidium phiomense</i>                                   |
| <i>Periconodon jaegeri</i>                                     | <i>Arsinoea kallamos</i>                                   |
| <i>Guangxilemur singsilai</i>                                  | <i>Catopithecus browni</i>                                 |
| <i>Hoanghoniuss stehlini</i>                                   | <i>Oligopithecus savagei</i> - <i>rogeri</i>               |
| <i>Sivaladapis nagrii</i>                                      | <i>Parapithecus fraasi</i>                                 |
| <i>Galagoides demidoff</i>                                     | <i>Proteopithecus sylviae</i>                              |
| <i>Microcebus murinus</i>                                      | <i>Qatrania wingi</i>                                      |
| <i>Nycticebus coucang</i>                                      | <i>Serapia eocaena</i>                                     |
| <i>Lemur catta</i>                                             | <i>Simonsius grangeri</i>                                  |
| <i>Absarokius</i> sp. - <i>abotti</i>                          | <i>Aotus trivirgatus</i> - <i>lemurinus</i>                |
| <i>Anaptomorphus</i> sp. - <i>westi</i>                        | <i>Saimiri sciureus</i>                                    |
| <i>Anemorhysis savagei</i> - <i>tenuiculus</i>                 | <i>Callicebus moloch</i>                                   |
| <i>Arapaphovius gazini</i>                                     | <i>Neosaimiri fieldsi</i>                                  |
| <i>Dyseolemur pacificus</i>                                    | <i>Dolichocebus gaimanensis</i>                            |
| <i>Hemiacodon gracilis</i>                                     | <i>Branisella boliviana</i>                                |
| <i>Loveina zephyri</i>                                         | <i>Myanmarpithecus yarshensis</i>                          |
| <i>Macrotarsius montanus</i>                                   | <i>Pondaungia cotteri</i>                                  |
| <i>Microchoerus erinaceus</i>                                  | <i>Siamopithecus eocaenus</i>                              |
| <i>Nannopithecus</i> sp. - <i>pollicaris</i> - <i>zuccolae</i> | <i>Bugtipithecus inexpectans</i>                           |
| <i>Necrolemur antiquus</i>                                     | <i>Phileosimias kamali</i> - <i>brahuiorum</i>             |
| <i>Omomys</i> sp. - <i>carteri</i>                             |                                                            |
| <i>Shoshonius cooperi</i>                                      |                                                            |
| <i>Steinius vespertinus</i>                                    |                                                            |
| <i>Strigorhysis</i> sp - <i>bridgerensis</i>                   |                                                            |
