# Supplementary material
Source: PubMed Central journal article supplement (PMC1150860)

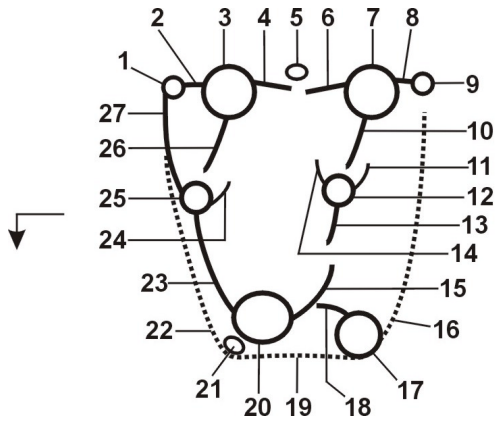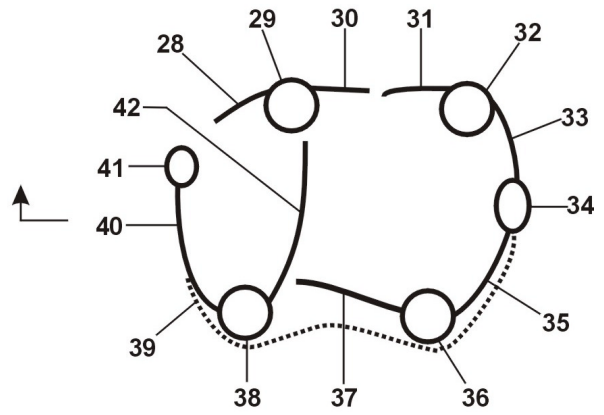

Supplement: pnas_0503469102_1.pdf [file pnas_0503469102_1.pdf]

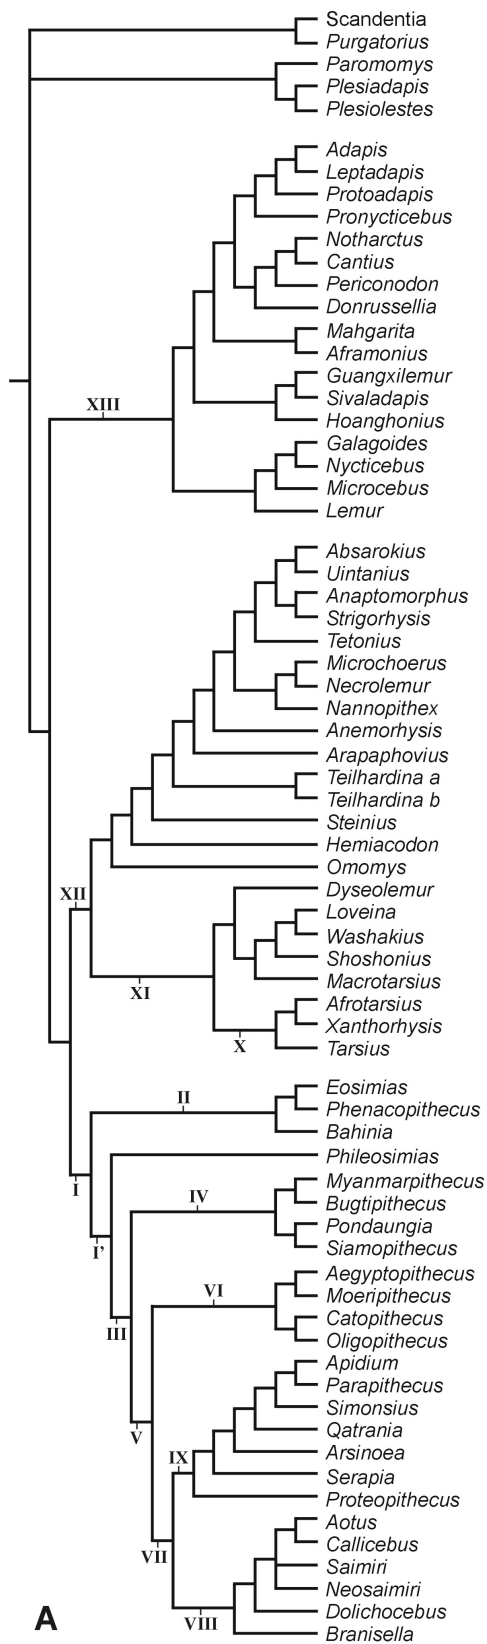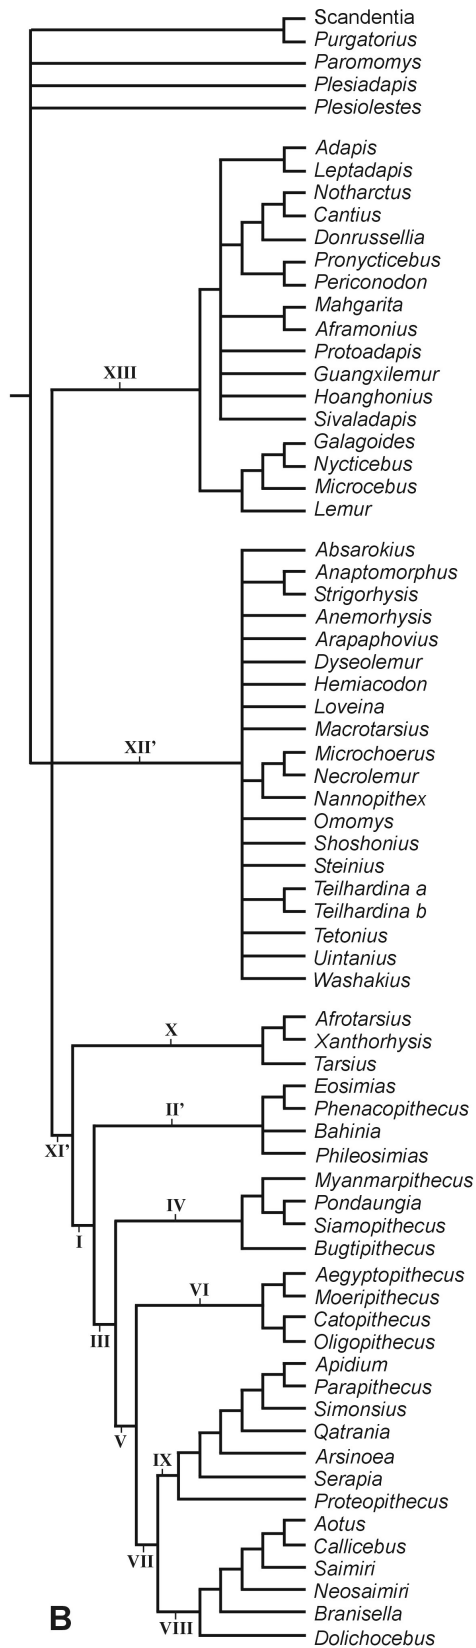

Supplement: pnas_0503469102_2.pdf [file pnas_0503469102_2.pdf]
